# 1 **Basal-like and Classical cells coexistence in pancreatic cancer** 2 **revealed by single cell analysis.**

3 Natalia Juiz<sup>1\*</sup>, Abdessamad Elkaoutari<sup>1\*</sup>, Martin Bigonnet<sup>1</sup>, Odile Gayet<sup>1</sup>, Julie Roques<sup>1</sup>, Rémy  
4 Nicole<sup>2</sup>, Juan Iovanna<sup>1,3+</sup> Nelson Dusetti<sup>1+</sup>

5  
6 \* Denotes authors with equal contribution

7 + Denotes co-corresponding authors

8  
9 <sup>1</sup>Centre de Recherche en Cancérologie de Marseille, CRCM, Inserm, CNRS, Institut Paoli-  
10 Calmettes, Aix-Marseille Université, Marseille, France.

11 <sup>2</sup>Programme Cartes d'Identité des Tumeurs (CIT), Ligue Nationale Contre le Cancer, Paris,  
12 France.

13 <sup>3</sup>Institut Paoli-Calmettes, Marseille, France.

14  
15 Short title: single cells analysis in PDAC

16  
17  
18  
19 Corresponding authors: Juan Iovanna ([juan.iovanna@inserm.fr](mailto:juan.iovanna@inserm.fr)) and Nelson Dusetti  
20 ([nelson.dusetti@inserm.fr](mailto:nelson.dusetti@inserm.fr)) et the Centre de Recherche en Cancérologie de Marseille (CRCM),  
21 INSERM U1068, CNRS UMR 7258, Aix-Marseille Université and Institut Paoli-Calmettes,  
22 Parc Scientifique et Technologique de Luminy, 163 Avenue de Luminy, 13288 Marseille,  
23 France. Phone +33-491828803; Fax +33-491 826083.

24

25

26 **Summary**

27 Pancreatic ductal adenocarcinoma (PDAC) is composed of stromal, immune and epithelial  
28 cells. Transcriptomic analysis of the epithelial compartment allows a binary classification into  
29 mainly two phenotypic subtypes, classical and basal-like. However, little is known about the  
30 intra-tumor heterogeneity of the epithelial component. Growing evidences suggest that this  
31 two side phenotypic segregation is not so clear and that both could coexist in a single tumor. In  
32 order to elucidate this hypothesis, we performed single-cell transcriptomic analyses using  
33 combinational barcoding on epithelial cells from 6 different classical PDAC obtained by  
34 Endoscopic Ultrasound (EUS) with Fine Needle Aspiration (FNA). In order to purify the  
35 epithelial compartment, PDAC were grown as Biopsy Derived Pancreatic Cancer Organoids.  
36 Single cell transcriptomic analysis allowed the identification of 4 main cell clusters present in  
37 different proportions in all tumors. Remarkably, although these tumors were classified as  
38 Classical, one of the clusters corresponded to a basal-like. These results depict the  
39 unanticipated high heterogeneity of pancreatic cancers and demonstrated that basal-like cells  
40 with a high aggressive phenotype are more widespread than expected.

41

## 42 **Introduction**

43 With a survival rate of 5 years in less than 8% of the cases (Siegel et al., 2018) pancreatic  
44 ductal adenocarcinoma (PDAC) is still one of the most lethal cancers. A principal problem  
45 facing this disease is its heterogeneity that results as a consequence of the combination of  
46 genetic, epigenetic, and micro-environmental factors (Lomberk et al., 2019, 2018; Yachida and  
47 Iacobuzio-Donahue, 2013). Recently, two main PDAC subtypes have been identified by  
48 molecular characterization: 1-classical, that are more frequently resectables, presenting a  
49 higher level of differentiation, often associated with fibrosis and inflammation; and 2-basal-  
50 like, with a poorest clinical outcome and a loss of differentiation (Moffitt et al., 2015; Nicolle  
51 et al., 2017). This well-established binary classification could be controverted if cells from a  
52 unique tumor contain both phenotypes at the same time. In fact, in addition to the tumor  
53 differences between patients that argues in favor of stratification for personalizing PDAC  
54 treatments, it is also absolutely necessary to consider the intra-tumor differences since they are  
55 playing key roles in the evolution of tumors (i.e.: they can conduce to clonal selection of  
56 resistant cells and to the relapse so frequently observed after the first line of chemotherapy).

57 Single-cell analysis by transcriptomics is nowadays a powerful strategy to determine the intra-  
58 tumor heterogeneity, however we need to bypass two main challenging difficulties: The first  
59 one is to obtain pure epithelial transformed cells. To do that, we specifically amplified these  
60 cells by a few passages in three dimensional (3D) *ex vivo* culture (Tiriach et al., 2019). Three  
61 dimensional (3D) cultures of PDAC as tumoral organoids preserve and allow the amplification  
62 only of epithelial cancerous cells and create complex structures with polarized cells that  
63 recapitulate tumor morphology and allow the communication among different cells within  
64 each microtumor (Boj et al., 2015; Tuveson and Clevers, 2019). In order to avoid excessive  
65 cell culturing, organoids were directly obtained from primary PDAC samples by endoscopic  
66 fine-needle aspiration (EUS-FNA). The second difficulty is to avoid inducing transcriptional  
67 modifications in the samples to be studied during library preparation. Most scRNA-seq  
68 methods require the capture of viable single cell by cell sorters (Picelli et al., 2013), droplet-  
69 based microfluidics (Klein et al., 2015; Macosko et al., 2015) or microwells. These  
70 manipulations can completely alter the transcriptional shape of cells, for this reason we  
71 decided to use a combinatorial barcoding method, known as the SPLIT-seq approach, that do  
72 not require cell physical isolation or complex and long manipulations and cells can be  
73 immediately fixed after dissociation (Cao et al., 2019, 2017; Rosenberg et al., 2018). The

74 combinational barcoding also presents an additional advantage regarding its compatibility  
75 with big longitudinal sample collections because of its reduced batch effects.

76 Therefore, in this work, we performed single cell analysis by the SPLIT-seq technology on  
77 Biopsy Derived Pancreatic Cancer Organoids (BDPCO) to unravel intratumoral heterogeneity  
78 exclusively in the epithelial compartment of 6 PDAC patients.

79

## 80 **Results**

### 81 **Phenotype characterization of organoids**

82 Six consecutive BDPCOs were prepared and characterized by histologic, immunostaining and  
83 transcriptomic analysis after a maximum of 4 *in vitro* passages (Figure 1). In all cases  
84 hematoxylin and eosin stained organoids exhibited the formation of glandular architectures  
85 with lumen and mucus secretion in all samples. Cells observed were polarized based on  
86 immunofluorescent staining for type IV collagen (COL IV) and zona occludes (ZO-1),  
87 markers of basement and apical membranes, respectively (Figure 1A and 1B). These  
88 anatomopathological characteristics suggests that all cells in the organoids come from the  
89 epithelial compartment and are organized as well differentiated glands suggesting that they  
90 belong phenotypically to the classical PDAC subtype. In order to confirm their transcriptomic  
91 phenotype, a profiling was performed using bulk RNA-seq on these 6 BDPCOs. A 50 gene  
92 molecular signature able to identify classical tumors was defined based on the recently Basal-  
93 like/classical classification proposed by Nicolle et al, 2017 (Nicolle et al., 2017). Accordingly,  
94 to the histologic features, the transcriptomic analysis shows that all BDCPOs present high  
95 expression of transcripts associated to the classical subtype indicating that they belong and  
96 preserve the classical PDAC phenotype (Figure 1C).

97 Then, in order to study PDAC heterogeneity, we started by characterizing vimentin (VIM)  
98 expression on these BDPOs by immunohistochemistry. We observed that most of the  
99 organoids that we obtained directly from patients are clearly heterogeneous presenting  
100 concomitantly VIM+ and VIM- cells (Figure 1D). Then, we confirmed that this heterogeneity  
101 is also present when organoids were grown *in vivo* as Patient Derived Xenografts (PDX). To  
102 do this, we injected these organoids in nude mice and found that this heterogeneous expression  
103 of VIM was conserved for at least two passages in PDX (Figure 1E). As VIM is a good basal-  
104 like marker, we hypothesized that heterogeneous organoids could contain concomitantly basal-

105 like and classical cells indicating that stratifying tumors in a binary classification (basal-like or  
106 classical) could not be as exact as previously supposed.

### 107 **Setting a performant scRNA-seq analysis by combinational indexing**

108 In order to perform single cell analysis, organoids cultures from 6 patients were dissociated in  
109 a single-cell suspension with a slight protease treatment (see M&M). Two thousands cells  
110 from each patient (12,000 total cells) were analyzed by single-cell combinational indexing  
111 using the SPLIT-seq technology as previously described (Rosenberg et al., 2018). Cells were  
112 formaldehyde-fixed and frozen immediately after treatment. Cultures were expanded to 8 wells  
113 on a 48 well/plate and the first indexes were added by retro-transcription. This step allowed the  
114 identification of each cell origin knowing that the first barcodes were sample-specific. This  
115 first barcoding round was followed by two consecutive ligation steps of barcodes in two 96  
116 well/plates, resulting in a total of 442,368 (48 x 96 x 96) different barcode combinations  
117 (Figure 2A). Following the library construction and sequencing, we obtained an excellent  
118 performance (in a single cell context) of uniquely mapped reads representing 64.67% of the  
119 total reads (982,396,428). After filtering at 15,000 reads by cell, 8,934 individual cells were  
120 validated to be considered for analysis with a median of 27,220 reads per cell. Most of the  
121 cells (74.45% from the total) were included indicating the high efficiency and quality of  
122 barcoding obtained with the modified SPLIT-seq method setup for this work. The *Pearson*  
123 correlation between read counts and genes was next to 1 (0.94) and the number of detected  
124 genes and reads were similarly distributed across patients. Both parameters indicate a good and  
125 unbiased library preparation and amplification (Figure S1A and B).

### 126 **Characterization of intra-organoid heterogeneity in 6 BDPCOs**

127 Unsupervised clustering analysis was performed using the shared nearest neighbor modularity  
128 optimization based algorithm implemented in Seurat R package. This transcriptomic single cell  
129 analysis on BDPCO highlighted 4 different cell subtypes with different gene expression  
130 profiles identified as four cell clusters named C0 to C3, being C0, the biggest one, accounting  
131 for 5,341 cells (about 60% of the total). C1 accounted for 1,521 cells (17%), C2 for 1,174 cells  
132 (13%) and C3 for 898 cells (10%) (Figure 2B). The cells distributed between the four clusters  
133 showed very low overlapping with cluster C1 and were more distal in the spatial distribution  
134 generated by UMAP (uniform manifold approximation and projection). These diversified  
135 transcriptomic patterns displayed by different cell sub-groups indicate that human pancreatic

136 tumor organoids maintain an important cell heterogeneity within the epithelial compartment of  
137 the tumor.

### 138 **Characterization of molecular markers in cell clusters**

139 To deeply characterize this intra BDPCO heterogeneity, we performed a differential analysis  
140 of gene expression between all four clusters (Figure 3A, 3B and Table S1). Except cluster C0,  
141 all other clusters are characterized by a high expression of at least one specific molecular  
142 marker. In fact, C0 cluster is mainly characterized by low expression of the genes identified as  
143 markers in other clusters (Figure 3B). The most remarkable cluster is C1 which is not only the  
144 most distal but also the cluster best defined by many specific molecular markers expressed in  
145 the majority of their cells. These markers include the phosphodiesterase *PDE3A*, the helicase  
146 *HFM1*, *DLG2* a member of the membrane-associated guanylate kinase family and *SLCO5A1*, a  
147 solute carrier organic anion transporter. It is important to note that *PDE3A* and *HFM1* are two  
148 of the best basal-like markers identified by Nicolle et al. 2017. Cluster C1 was also  
149 characterized by a lower expression level in a particular set of genes compared to all other  
150 clusters. This low expression gene set includes *INO80D* a component of chromatin remodeling  
151 complex, *TERF2* a component of the telomere nucleoprotein complex and *CSMD1* which is a  
152 potential tumor suppressor as suggested by the fact that its expression in human breast cancer  
153 cells inhibited their aggressiveness, migration, adhesion and invasion (Escudero-Esparza et al.,  
154 2016) (Figure 3A, 3B and Table S1). Cluster C2 presented a high expression of *NEAT1* in  
155 100% of the cells; *NEAT1* is a long non-coding RNA that regulates the transcription of genes  
156 involved in cancer progression (He et al., 2019; Zeng et al., 2020). The most specific markers  
157 of cluster C3 were ANKRD36, ANKRD36C, and ANKRD36B. These genes encode for  
158 ANRK proteins, three cell cycle-regulated kinases that appear to be involved in microtubule  
159 formation and/or stabilization at the spindle pole during chromosome segregation.  
160 Remarkably, supporting this fact, a recent study revealed that ANKRD36 is an oncogene  
161 whose expression was linked with poor prognosis in renal cell carcinoma (Yamada et al.,  
162 2018).

### 163 **Molecular components revealed the presence of basal-like cells in classical PDAC** 164 **organoids**

165 In order to annotate the single-cell clusters in accordance to their tumoral phenotype we  
166 extracted a basal-like and a classical PDAC component by performing an Independent  
167 Component Analysis (ICA) on the transcriptome dataset from the Nicolle et al. study (Nicolle

168 et al., 2017). To validate the association of these two components to basal-like and classical  
169 phenotypes, we compared the correlation of the 1003 basal-like and 776 classical gene markers  
170 obtained from the Nicolle et al. work (Nicolle et al., 2017). As shown in Figure 4A by ICA  
171 analysis, the classical markers were significantly higher in the classical component compared  
172 to the basal-like (Student t-test p-value < 1e-16) and, as expected, the basal-like were  
173 significantly higher than classical in the basal-like component identified (t-test p-value < 1e-  
174 16). The projection of the average of the gene expression of clusters on these two components  
175 allowed the association of two molecular scores, the first corresponding to the classical and the  
176 second to the basal-like subtype. It is important to note that cluster C1 had the highest basal-  
177 like score while its classical score was the lowest among all other clusters. This supports the  
178 hypothesis that cluster C1 presents the most basal-like characteristics from all others. Cluster  
179 C2 presents a similar classical score when compared to C0 and C3 but was the cluster that had  
180 the lowest basal-like score (Figure 4B). Similar results were obtained at single-cell level by  
181 calculating the component scores of each individual cell (Figure 4C) confirming that cluster  
182 C1 contain basal-like cells that coexist with classical cells in all 6 BDPCOs. Cluster C1  
183 contains 17% of all cells in our study which could represent the proportion of basal-like cells  
184 in these samples. The cluster C2 contains the most classical cells followed by C3 and then  
185 cluster C0. In terms of aggressiveness the single-cell clusters identified in this study could be  
186 ordered from the most to the least aggressive sub-group as follows: C1, C0, C3 and C2  
187 respectively.

188

### 189 **Analysis of pathway that characterize the different clusters**

190 To characterize the biological profiles specifically associated with these different cell clusters,  
191 we performed pathway analysis using KEGG (Kyoto Encyclopedia of Genes and Genomes)  
192 (Figure 5A). Top enriched signaling pathways in cluster C0 were mainly the PI3K-Akt and  
193 Sphingolipid pathways. Studies showed that abnormal activation of the PI3K/AKT pathway  
194 promotes the proliferation of cancerous cells (Porta et al., 2014 ; Vasioukhin, 2012) Cluster C1  
195 was characterized by a specific enrichment in many KEGG pathways including Adherents  
196 junction, Focal adhesion, Leukocyte trans endothelial migration, Glycolysis/Gluconeogenesis,  
197 Tight junction, etc. Most of these pathways are linked to each other as shown in the gene-  
198 function network (Figure 5B) and could indicate a high functional interaction of C1 cells with  
199 the extracellular matrix through which the cancerous cells have to migrate during the



200 metastatic process (Maziveyi and Alahari, 2017; Vasioukhin, 2012). This analysis suggests  
201 that cluster C1 is highly invasive with a greater capacity to migrate and metastasize, this  
202 characteristic makes sense with the aggressive behavior of basal-like cells. Enriched pathways  
203 in cluster C2 were related to Mitophagy and AMPK signaling pathways among others.  
204 Previous studies have shown that activation of AMPK was an important regulator of  
205 mitochondrial homeostasis and that this activation initiates synthesis of new mitochondria to  
206 replace the damaged ones. In addition, activation of mitophagy pathways acts as key regulator  
207 of mitochondrial mass in cancerous cells as well as in homeostasis, bioenergetics, oncogene-  
208 driven metabolic reprogramming and cell apoptosis (Vara-Perez et al., 2019). Finally, cluster  
209 C3 was uniquely enriched in Neurotrophin signaling pathway. Recent studies have shown that  
210 the role of neurotrophins is not limited to neuronal tumors but also linked to nonneuronal  
211 tumors like thyroid, breast, lung, and prostate cancer (Tan et al., 2014).

### 212 **Pseudotime analysis of BDPCOs uncovers a differentiation trajectory**

213 To unravel the putative developmental trajectory of cells during the tumorigenesis process we  
214 performed a single cell trajectory analysis using Monocle2 pseudotime trajectory (Qiu et al.,  
215 2017). The trajectory describes the virtual route through which the cells undergo changes  
216 during a defined biological process. Thus, the order of cells in the pseudotime trajectory  
217 depends on its particular state in this process. Our analysis resulted in a trajectory of multiple  
218 branches with cells from different clusters located in different places. This remote arrangement  
219 of clusters reflects the transcriptomic heterogeneity of the cells that compose each of them. As  
220 shown in Figure 6 and Figure S2, cells from different clusters were located in different  
221 branches of the trajectory especially sub-group C1 which presents the more distal location  
222 indicating a different state compared to others. Two main branches could be distinguished on  
223 the trajectory. The horizontal branches which contains principally the cells of cluster C1 and  
224 the vertical branches containing cells from other clusters. Clusters C2 and C3 were located in  
225 the bottom side of the horizontal branches while the cells of cluster C0 were located more on  
226 the top side. These observations lead us to hypothesize that the clusters could follow an  
227 organized temporal status during the tumorigenesis process as represented here by the  
228 pseudotime trajectory. Interestingly, the aggressiveness of cells (considering basal-like cells  
229 the most aggressive) seems to increase from the vertical-bottom (cluster C2 and C3) passing  
230 via vertical-top to the vertical left (cluster C0) to right branches (cluster C1) of the pseudotime  
231 trajectory (Figures 6, trajectory for each cluster and S2 trajectory for all clusters together).



232

### 233 **Cell clusters in PDAC organoids are conserved across patients**

234 By using combinatorial barcoding, we were able to determine the patient's origin for each  
235 single cell in our study. In Figure 7, we split cells on the UMAP clustering according to  
236 patients and determined their proportions of each cluster. The four cell clusters found in this  
237 study were present in all six samples (Figure 7A and 7B) but in different proportions. In fact,  
238 and as an example, the proportion of cells that belonged to cluster C1, decreased from 20% in  
239 patient P2 to ~12% in patient P1 (Table S3). To determine whether these different associations  
240 between patients and clusters are significant, we used *Pearson's* Chi-squared test with  
241 simulated p-value based on 1000 replicates. We obtained a chi-square statistic of 53.2 and p-  
242 value  $< 1e-05$  indicating that the cluster content statistically depends on the patient's origin.  
243 Moreover, by using the *Pearson's* residuals for which the absolute values indicate the  
244 contribution to the total Chi-square score above, we highlight the nature of dependence  
245 between each clusters and patients (Table S4). The results in Figure 7B showed the distinctive  
246 association between clusters across patients. For instance, cluster C1 had a strongest positive  
247 association with patient P2, then patient P4 and P6 respectively. However, this cluster (C1)  
248 had a repulsive relationship particularly with patients P1 then P3 and patient P5 at lower level.  
249 Other clusters were also associated distinctively to different patients such as C0 which was  
250 positively associated to P1 and negatively to P2 and P3 (Figure 7B). These results show that  
251 the intra-tumoral heterogeneity of PDAC cells is conserved across the patients but the content  
252 in the different clone vary between patients highlighting the heterogeneity between PDAC  
253 patients.

254

### 255 **Discussion**

256 One of the main difficulties in finding an effective treatment for PDAC is its heterogeneity.  
257 PDAC is currently stratified into two main different phenotypes: basal-like and classical, based  
258 on molecular subtyping by gene expression profiling (Moffitt et al., 2015; Nicolle et al., 2017).  
259 However, this practical classification does not take into account the heterogeneity that exists  
260 within each tumor and many sources of evidence indicate that mixed tumors (containing basal-  
261 like and classical cells) could exist. Characterizing this intra-tumor heterogeneity is essential  
262 for really understanding PDAC evolution and to envision new insights that will conduce to

263 more personalized and efficient therapies. Recently, it became possible to investigate intra-  
264 tumor heterogeneity at a single-cell resolution identifying different cell types in PDAC and  
265 opening a way to study distinct functions of cancer-associated fibroblasts subtypes in PDAC  
266 immunity and progression (Elyada et al., 2019). In fact, human primary tumor from surgery,  
267 pancreatic biopsies obtained by EUS-FNA and/or xenografts contains many different types of  
268 cells other than epithelial (fibroblasts, immune infiltrate, blood cells, etc) which can  
269 significantly impact the study of the differences between tumor cells in single-cell  
270 experiments. However, the organoid is an excellent model for in depth analysis of pure  
271 epithelial tumor cells allowing the study of intrinsic epithelial heterogeneity in a single  
272 pancreatic tumor (Brazovskaja et al., 2019). From a methodological standpoint, the study  
273 presented here represents a proof of concept that SPLIT-seq technique on BDPCO can be used  
274 to deeply characterize tumor heterogeneity in the epithelial cell compartment of PDAC. We  
275 choose this approach because it presents many advantages for studying PDAC heterogeneity  
276 on samples directly obtained from patients. It includes the possibility of studying a high  
277 number of cells in a single experiment obtaining up to 884,736 unique barcode combinations  
278 after 3 ligations, profiling several samples in parallel thus reducing the batch effect, and better  
279 preservation of the transcriptomes by reducing the steps required before cell fixation.

280 In our study, we characterized six consecutive PDAC tumors from patients to analyze their  
281 intra-tumor heterogeneity. The 6 tumors used in our study were of classical subtype as  
282 suggested by our histologic, immunofluorescence and transcriptomic analyses. It is important  
283 to note that we detected some cells expressing VIM, as a basal-like marker, in all these  
284 organoids, as well as in the organoids-derived PDXs, after at least two consecutive passages in  
285 mice, indicating that the intra-tumor heterogeneity in PDAC is frequent if not systematic. At  
286 the scRNA analysis we identified four cell clusters or subpopulations, using a well-defined  
287 bioinformatics set-up, in all six patients analyzed. Remarkably, these clusters are recurrently  
288 present in the PDAC tumors although in different proportions, suggesting that the  
289 aggressiveness of the PDAC could be controlled, at least in part, by the presence of the most  
290 aggressive subpopulation, probably the C1. In addition, another source of the intra-tumor  
291 heterogeneity of the epithelial cells, which was not considered here, may originate from the  
292 local differences of the tumor.

293 In this study we intended to highlight for the first time the intrinsic heterogeneity within the  
294 epithelial cancerous cell compartment of 6 classical PDAC patients. We observed that the  
295 cluster C0 contains most of the cells studied which share a common transcriptomic profile.

296 Other clusters were characterized by the expression of specific transcriptomic markers  
297 expressed in the majority of cells. In many cases, these markers have been previously related  
298 to tumor specific biology. For instance, *NEATI* (marker of cluster C2) has shown to be up-  
299 regulated in cancer and plays a role in most types of solid tumors by regulating tumor  
300 suppressive microRNAs (Yu et al., 2017), *NEATI* has been suggested as a marker of poor  
301 prognosis in colorectal cancer (Li et al., 2015) and glioma (He et al., 2019). Cells of cluster  
302 C1 were also characterized by several specific molecular markers such as for example *PDE3A*  
303 that encodes a protein which controls degradation of cyclic AMP (cAMP) and GMP (cGMP)  
304 (Beavo, 1995) that regulates various physiologic processes including adherents junction,  
305 glycolysis/gluconeogenesis and leukocyte transendothelial migration pathways. This high  
306 expression suggests that C1 cells have high metabolic and migration activities, which could  
307 correspond to highly aggressiveness cells with strong metastatic potential, supporting the  
308 basal-like phenotype of this cluster. Altogether, the diversified transcriptomic patterns  
309 displayed by different clusters indicate that PDAC organoids maintain important cell  
310 heterogeneity and that the presence of basal-like cells within all PDAC tumors studied here  
311 brings new insights into the intra-tumoral heterogeneity in PDAC cancer.

312 In a recent work, Peng et al. (Peng et al., 2019) ports a study on single cell transcriptome analysis of a  
313 total of 57,530 cells from 24 primary PDAC tumors and 11 control pancreases. They found that PDAC  
314 tumor mass is highly heterogeneous and composed of diverse malignant and stromal cell types as  
315 expected. In addition, they report that malignant ductal subtype could be distinguished by featured gene  
316 expression profile and was observed to contain highly proliferative and migratory subpopulations. They  
317 suggest that these cell subtypes could correspond to the basal-like, which represents around 6.30% of  
318 the ductal in their samples, and classical subtype which represent 26.95% of the cells, however their  
319 protocol setup was directed mainly to describe the cellular composition of the PDAC.

320 In summary, scRNA-seq analysis performed on 6 consecutives PDAC as organoids allowed us the  
321 identification of four main cell clusters present in different proportions in all tumors. Clusters show a  
322 specific gene expression profile associated with specific biological characteristics and molecular  
323 markers. Although these tumors were classified as Classical when analyzed in bulk, one of the clusters  
324 present in all of the patients, corresponded to a basal-like phenotype. These results depict the  
325 unanticipated high heterogeneity of pancreatic cancers and demonstrated that basal-like cells with a  
326 highly aggressive phenotype are more widespread than expected. We conclude that Basal-like and  
327 Classical cells coexist in PDAC.

328

## 329 **Acknowledgments**

330 This work was supported by INCa (Grants number 2018-078 and 2018-079), Canceropole  
331 PACA, Amidex Foundation, Fondation de France, La Ligue Contre le Cancer and INSERM.  
332 Authors wish to thanks Christopher Pin for critically reading the manuscript.

## 333 **Author Contributions**

334 The study was designed by N. D., R. N. and J. I. The experiments were conducted by N. J., J.  
335 R., M. B. and O. G. Data was analyzed by A. E. and R. N. The manuscript was written by N.  
336 J., A. E., J. I. and N. D. All authors read and approved the final manuscript.

## 337 **Declaration of Interests**

338 The authors declare no competing interests

## 339 **MATERIALS AND METHODS**

### 340 **Samples**

341 Patients were included under the Paoli Calmettes Institute clinical trial NCT01692873  
342 (<https://clinicaltrials.gov/show/NCT01692873>). Consent forms of informed patients were  
343 collected and registered in a central database.

344 Primary PDAC-derived organoids were obtained from consecutive patients with unresectable  
345 tumors by endoscopic fine-needle aspiration (EUS-FNA). Biopsies were slightly digested with  
346 the Tumor Dissociation Kit, human (Miltenyi Biotec) at 37°C for 5 min, then incubated with  
347 Red Blood Cell Lysis Buffer (Roche), and washed two times with PBS. Samples were placed  
348 into 12-well plates coated with 150 µl GFR matrigel (Corning) and cultured with pancreatic  
349 organoid feeding media (advanced DMEM/F12 supplemented with 10 mM HEPES; Thermo-  
350 Fisher); 1x Glutamax (Thermo-Fisher); penicillin/streptomycin (Thermo-Fisher); 100 ng/ml  
351 animal-free recombinant human FGF10 (Peprotech); 50 ng/ml animal-free recombinant human  
352 EGF (Peprotech); 100 ng/ml recombinant human Noggin (Biotechne); Wnt3a-conditioned  
353 medium (30% v/v); RSPO1-conditioned medium (10% v/v); 10 nM human Gastrin 1 (Sigma  
354 Aldrich) 10 mM Nicotinamide (Sigma Aldrich); 1.25 mM N acetylcysteine (Sigma Aldrich);  
355 1x B27 (Invitrogen); 500 nM A83-01 (Tocris); 10.5 µM Y27632 (Tocris). The plates were  
356 incubated at 37°C in a 5% CO<sub>2</sub> incubator, and the media changed every 3 to 4 days.

## 357 **Immunohistochemistry**

358 Organoids and PDX were embedded, section and stained for H&E and/or histology.  
359 Immunofluorescent staining with COL-IV and ZO-1 antibodies was performed using anti-  
360 collagen IV rabbit polyclonal antibody (Abcam, ref ab6586), anti-ZO1 monoclonal antibody  
361 (ThermoFisher, ref Z01-1A12) and Anti-Vimentin monoclonal antibody (Sigma, ref. V6389)  
362 following standard methods.

## 363 **Single-cell transcriptomics**

364 For single-cell transcriptomic, we performed a modified SPLIT-seq protocol similar to the  
365 already described by Rosenberg *et al.* (Rosenberg *et al.*, 2018). Briefly, single-cell suspensions  
366 from organoids were fixed with 1% formaldehyde solution in PBS and stored at -80°C  
367 immediately after dissociation. All samples were thawed in ice and permeabilized with 0.2%  
368 Triton X-100. Samples were divided into a 48-well plate. Retro-transcription was performed  
369 with well-specific barcoded oligo(dT) and hexamer primers. Cells were pooled and split twice  
370 to 96-well plates for two successive ligation steps where a second and a third well-specific  
371 barcodes were added to the cDNA. For library preparation, two rounds of SPRI size selection  
372 were performed after cDNA amplification and the tagmentation steps. Illumina amplicons  
373 were generated from 1 ng instead of 600 pg of cDNA and sequenced using the Illumina  
374 Novaseq platform.

## 375 **scRNA-seq data processing**

376 Raw sequencing data were processed using the zUMIs pipeline (Parekh *et al.*, 2018) which  
377 consisted mainly in extracting barcodes, filtering cells, mapping using human genome  
378 GRCh38.96 and generating read count tables. Downstream analyses on gene-by-cell count  
379 matrix were performed with the R package Seurat, version 3 (Butler *et al.*, 2018). These  
380 consist mainly of normalization, dimensional reduction (including PCA and UMAP algorithm)  
381 and cell classification using a shared nearest neighbor (SNN) modularity optimization based  
382 clustering algorithm. Markers for each cluster were identified based on differential gene  
383 expression using the Seurat's function FindMarkers. Pseudotime analysis was performed using  
384 the R package Monocle2 trajectory (Qiu *et al.*, 2017). Enrichment analyses including Gene  
385 Ontology and KEGG Pathway were performed using R packages such as ClusterProfiler (Yu  
386 *et al.*, 2017).

387

388 **Identification of basal-like and classical components**

389 Transcriptomic dataset was pre-processed and normalized using only 50% most variable  
390 genes. Thus, data were thus sample-wise zero-centered and scaled. Independent component  
391 analysis was performed with JADE (joint approximate diagonalization of eigenmatrices)  
392 algorithm. Two components were retrieved using biologically relevant composition. The  
393 annotation of the components was performed using external data including PDX samples and  
394 lists of basal-like and classical markers. The cluster projections and gene correlation to the  
395 components was performed using custom R scripts and basic functions of R language.

396

397 **Figure legends**

398 **Figure 1**

399 **Characterization of PDAC-derived organoids**

400 **A.** Histological characterization of the 6 BDPCO by H&E staining. **B.** Organoids show the  
401 presence of glandular structures composed by an apical pole (marked by ZO-1 in green) and a  
402 basolateral membrane (marked by COL-IV in red). Scale bar is 50  $\mu$ m. **C.** Heatmap showing  
403 the expression of a 50 gene molecular signature able to identify classical tumors in all six  
404 patients. **D.** Immunohistochemical characterization of the six BDPCO with anti-vimentin  
405 antibodies. **E.** Immunohistochemical characterization of the six BDPCO derived PDX with  
406 anti-vimentin antibodies.

407 **Figure 2**

408 **Identification of cell clusters by scRNA-seq from PDAC organoids**

409 **A.** Experimental design. Organoids were cultured from EUS-FNA samples, dissociated into  
410 single cells, splited into wells and labeled with well-specific barcodes. During the first round  
411 RT barcoded primers were added to the RNA, followed by ligation of a second and third  
412 barcode. The final cDNA library was sequenced on a NovaSeq platform. **B.** UMAP projections  
413 of combined single-cell profiles from the six patients. Each dot represents a single cell, and  
414 color refers different clusters. Number of cells in each cluster is indicated.

415 **Figure 3**

416 **Characterization of cell clusters**

417 **A.** Feature plot highlighting the expression of the gene markers for each cluster and the  
418 corresponding violin plots. **B.** Dot plot for the top markers of clusters. The dot size represents  
419 the percentage of cells expressing the marker and the colors indicate the expression level.

420 **Figure 4**

421 **Identification and application of basal-like and classical components from transcriptomic**  
422 **to the single-cell data**

423 **A.** Boxplots comparing basal-like and classical gene markers in the molecular components. **B.**  
424 Projections of average expression values of single-cell clusters on the components. **C.**



425 Individual projections of each single-cell on the components. The boxplots of the single-cells  
426 projections were plotted by cluster.

427 **Figure 5**

428 **Pathway signatures of cell subtypes in organoids**

429 **A.** Enrichment plot from KEGG pathway analysis comparing the single-cell clusters. **B.**  
430 Visualization of Gene-function network of top enriched pathways in cluster C1. The size is  
431 proportional to the number of genes associated to each pathway while the color indicates the  
432 average expression of genes in cluster C1.

433 **Figure 6**

434 **Pseudotime analysis of PDAC organoids**

435 Pseudotime trajectory of single-cell transcriptomes simulating biological process in PDAC  
436 organoids. Each cluster of cells was plotted separately.

437 **Figure 7**

438 **Intra-tumoral heterogeneity is conserved across the patients with different proportions**

439 **A.** UMAP projections of combined single-cell clusters separately for each patient. **B.**  
440 Correlogram plot of *Pearson's* residuals from Chi-squared test between the cluster and  
441 patients. The color of circles indicates the nature of relationship between the patients and  
442 clusters while the absolute value indicates the global contribution to Chi-square score.

443 **Legend of Supplementary Figures**

444 **Supplementary Figure S1**

445 **Performance of scRNA-seq by combinational indexing**

446 **A.** Scatter plot showing the correlation between read counts and genes (Pearson coefficient  
447 =0.94). **B.** Violin plots of detected genes and number of reads across patients.

448 **Supplementary Figure S2**

449 **Pseudotime trajectory**

450 Pseudotime trajectory analysis indicating the state of all cells from the four clusters together on  
451 the same trajectory.

452 **References**

- Beavo, J.A., 1995. Cyclic nucleotide phosphodiesterases: functional implications of multiple isoforms. *Physiol. Rev.* 75, 725–748. <https://doi.org/10.1152/physrev.1995.75.4.725>
- Boj, S.F., Hwang, C.-I., Baker, L.A., Chio, I.I.C., Engle, D.D., Corbo, V., Jager, M., Ponz-Sarvisé, M., Tiriác, H., Spector, M.S., Gracanin, A., Oni, T., Yu, K.H., van Boxtel, R., Huch, M., Rivera, K.D., Wilson, J.P., Feigin, M.E., Öhlund, D., Handly-Santana, A., Ardito-Abraham, C.M., Ludwig, M., Elyada, E., Alagesan, B., Biffi, G., Yordanov, G.N., Delcuze, B., Creighton, B., Wright, K., Park, Y., Morsink, F.H.M., Molenaar, I.Q., Borel Rinkes, I.H., Cuppen, E., Hao, Y., Jin, Y., Nijman, I.J., Iacobuzio-Donahue, C., Leach, S.D., Pappin, D.J., Hammell, M., Klimstra, D.S., Basturk, O., Hruban, R.H., Offerhaus, G.J., Vries, R.G.J., Clevers, H., Tuveson, D.A., 2015. Organoid models of human and mouse ductal pancreatic cancer. *Cell* 160, 324–338. <https://doi.org/10.1016/j.cell.2014.12.021>
- Brazovskaja, A., Treutlein, B., Camp, J.G., 2019. High-throughput single-cell transcriptomics on organoids. *Curr. Opin. Biotechnol.* 55, 167–171. <https://doi.org/10.1016/j.copbio.2018.11.002>
- Butler, A., Hoffman, P., Smibert, P., Papalexi, E., Satija, R., 2018. Integrating single-cell transcriptomic data across different conditions, technologies, and species. *Nat. Biotechnol.* 36, 411–420. <https://doi.org/10.1038/nbt.4096>
- Cao, J., Packer, J.S., Ramani, V., Cusanovich, D.A., Huynh, C., Daza, R., Qiu, X., Lee, C., Furlan, S.N., Steemers, F.J., Adey, A., Waterston, R.H., Trapnell, C., Shendure, J., 2017. Comprehensive single-cell transcriptional profiling of a multicellular organism. *Science* 357, 661–667. <https://doi.org/10.1126/science.aam8940>
- Cao, J., Spielmann, M., Qiu, X., Huang, X., Ibrahim, D.M., Hill, A.J., Zhang, F., Mundlos, S., Christiansen, L., Steemers, F.J., Trapnell, C., Shendure, J., 2019. The single-cell transcriptional landscape of mammalian organogenesis. *Nature* 566, 496–502. <https://doi.org/10.1038/s41586-019-0969-x>
- Cong, T., Liu, G.X., Cui, J.X., Zhang, K.C., Chen, Z.D., Chen, L., Wei, B., Huang, X.H., 2018. [Exome sequencing of gastric cancers screened the differences of clinicopathological phenotypes between the mutant and the wide-type of frequently mutated genes]. *Zhonghua Yi Xue Za Zhi* 98, 2242–2245. <https://doi.org/10.3760/cma.j.issn.0376-2491.2018.28.006>
- Elyada, E., Bolisetty, M., Laise, P., Flynn, W.F., Courtois, E.T., Burkhart, R.A., Teinor, J.A., Belleau, P., Biffi, G., Lucito, M.S., Sivajothi, S., Armstrong, T.D., Engle, D.D., Yu, K.H., Hao, Y., Wolfgang, C.L., Park, Y., Preall, J., Jaffee, E.M., Califano, A., Robson, P., Tuveson, D.A., 2019. Cross-Species Single-Cell Analysis of Pancreatic Ductal Adenocarcinoma Reveals Antigen-Presenting Cancer-Associated Fibroblasts. *Cancer Discov* 9, 1102–1123. <https://doi.org/10.1158/2159-8290.CD-19-0094>
- Escudero-Esparza, A., Bartoschek, M., Gialeli, C., Okroj, M., Owen, S., Jirström, K., Orimo, A., Jiang, W.G., Pietras, K., Blom, A.M., 2016. Complement inhibitor CSMD1 acts as tumor suppressor in human breast cancer. *Oncotarget* 7, 76920–76933. <https://doi.org/10.18632/oncotarget.12729>
- Han, X., Wang, R., Zhou, Y., Fei, L., Sun, H., Lai, S., Saadatpour, A., Zhou, Z., Chen, H., Ye, F., Huang, D., Xu, Y., Huang, W., Jiang, M., Jiang, X., Mao, J., Chen, Y., Lu, C., Xie, J., Fang, Q., Wang, Y., Yue, R., Li, T., Huang, H., Orkin, S.H., Yuan, G.-C., Chen, M., Guo, G., 2018. Mapping the Mouse Cell Atlas by Microwell-Seq. *Cell* 172, 1091–1107.e17. <https://doi.org/10.1016/j.cell.2018.02.001>
- He, C., Jiang, B., Ma, J., Li, Q., 2016. Aberrant NEAT1 expression is associated with clinical outcome in high grade glioma patients. *APMIS* 124, 169–174. <https://doi.org/10.1111/apm.12480>
- He, Z., Dang, J., Song, A., Cui, X., Ma, Z., Zhang, Z., 2019. NEAT1 promotes colon cancer progression through sponging miR-495-3p and activating CDK6 in vitro and in vivo. *J. Cell. Physiol.* 234, 19582–19591. <https://doi.org/10.1002/jcp.28557>
- Human Organoids Share Structural and Genetic Features with Primary Pancreatic Adenocarcinoma Tumors. - PubMed - NCBI [WWW Document], n.d. URL <https://www.ncbi.nlm.nih.gov/pubmed/30171177> (accessed 12.10.19).

- Iovanna, J., Dusetti, N., 2017. Speeding towards individualized treatment for pancreatic cancer by taking an alternative road. *Cancer Lett.* 410, 63–67. <https://doi.org/10.1016/j.canlet.2017.09.016>
- Irani, S., Salajegheh, A., Smith, R.A., Lam, A.K.-Y., 2014. A review of the profile of endothelin axis in cancer and its management. *Crit. Rev. Oncol. Hematol.* 89, 314–321. <https://doi.org/10.1016/j.critrevonc.2013.08.011>
- Klein, A.M., Mazutis, L., Akartuna, I., Tallapragada, N., Veres, A., Li, V., Peshkin, L., Weitz, D.A., Kirschner, M.W., 2015. Droplet barcoding for single-cell transcriptomics applied to embryonic stem cells. *Cell* 161, 1187–1201. <https://doi.org/10.1016/j.cell.2015.04.044>
- Le Bras, G.F., Taubenslag, K.J., Andl, C.D., 2012. The regulation of cell-cell adhesion during epithelial-mesenchymal transition, motility and tumor progression. *Cell Adh Migr* 6, 365–373. <https://doi.org/10.4161/cam.21326>
- Li, Yunlong, Li, Yaohui, Chen, W., He, F., Tan, Z., Zheng, J., Wang, W., Zhao, Q., Li, J., 2015. NEAT expression is associated with tumor recurrence and unfavorable prognosis in colorectal cancer. *Oncotarget* 6, 27641–27650.
- Lomberk, G., Blum, Y., Nicolle, R., Nair, A., Gaonkar, K.S., Marisa, L., Mathison, A., Sun, Z., Yan, H., Elarouci, N., Armenoult, L., Ayadi, M., Ordog, T., Lee, J.-H., Oliver, G., Klee, E., Moutardier, V., Gayet, O., Bian, B., Duconseil, P., Gilbert, M., Bigonnet, M., Garcia, S., Turrini, O., Delperro, J.-R., Giovannini, M., Grandval, P., Gasmi, M., Secq, V., De Reyniès, A., Dusetti, N., Iovanna, J., Urrutia, R., 2018. Distinct epigenetic landscapes underlie the pathobiology of pancreatic cancer subtypes. *Nat Commun* 9, 1978. <https://doi.org/10.1038/s41467-018-04383-6>
- Lomberk, G., Dusetti, N., Iovanna, J., Urrutia, R., 2019. Emerging epigenomic landscapes of pancreatic cancer in the era of precision medicine. *Nat Commun* 10. <https://doi.org/10.1038/s41467-019-11812-7>
- Macosko, E.Z., Basu, A., Satija, R., Nemes, J., Shekhar, K., Goldman, M., Tirosh, I., Bialas, A.R., Kamitaki, N., Martersteck, E.M., Trombetta, J.J., Weitz, D.A., Sanes, J.R., Shalek, A.K., Regev, A., McCarroll, S.A., 2015. Highly Parallel Genome-wide Expression Profiling of Individual Cells Using Nanoliter Droplets. *Cell* 161, 1202–1214. <https://doi.org/10.1016/j.cell.2015.05.002>
- Maziveyi, M., Alahari, S.K., 2017. Cell matrix adhesions in cancer: The proteins that form the glue. *Oncotarget* 8, 48471–48487. <https://doi.org/10.18632/oncotarget.17265>
- Moffitt, R.A., Marayati, R., Flate, E.L., Volmar, K.E., Loeza, S.G.H., Hoadley, K.A., Rashid, N.U., Williams, L.A., Eaton, S.C., Chung, A.H., Smyla, J.K., Anderson, J.M., Kim, H.J., Bentrem, D.J., Talamonti, M.S., Iacobuzio-Donahue, C.A., Hollingsworth, M.A., Yeh, J.J., 2015. Virtual microdissection identifies distinct tumor- and stroma-specific subtypes of pancreatic ductal adenocarcinoma. *Nat. Genet.* 47, 1168–1178. <https://doi.org/10.1038/ng.3398>
- Nicolle, R., Blum, Y., Marisa, L., Loncle, C., Gayet, O., Moutardier, V., Turrini, O., Giovannini, M., Bian, B., Bigonnet, M., Rubis, M., Elarouci, N., Armenoult, L., Ayadi, M., Duconseil, P., Gasmi, M., Ouaiissi, M., Maignan, A., Lomberk, G., Boher, J.-M., Ewald, J., Bories, E., Garnier, J., Goncalves, A., Poizat, F., Raoul, J.-L., Secq, V., Garcia, S., Grandval, P., Barraud-Blanc, M., Norguet, E., Gilbert, M., Delperro, J.-R., Roques, J., Calvo, E., Guillaumond, F., Vasseur, S., Urrutia, R., de Reyniès, A., Dusetti, N., Iovanna, J., 2017. Pancreatic Adenocarcinoma Therapeutic Targets Revealed by Tumor-Stroma Cross-Talk Analyses in Patient-Derived Xenografts. *Cell Rep* 21, 2458–2470. <https://doi.org/10.1016/j.celrep.2017.11.003>
- Parekh, S., Ziegenhain, C., Vieth, B., Enard, W., Hellmann, I., 2018. zUMIs - A fast and flexible pipeline to process RNA sequencing data with UMIs. *Gigascience* 7. <https://doi.org/10.1093/gigascience/giy059>
- Peng, J., Sun, B.-F., Chen, C.-Y., Zhou, J.-Y., Chen, Y.-S., Chen, H., Liu, L., Huang, D., Jiang, J., Cui, G.-S., Yang, Y., Wang, W., Guo, D., Dai, M., Guo, J., Zhang, T., Liao, Q., Liu, Y., Zhao, Y.-L., Han, D.-L., Zhao, Y., Yang, Y.-G., Wu, W., 2019. Single-cell RNA-seq highlights intra-tumoral heterogeneity and malignant progression in pancreatic ductal adenocarcinoma. *Cell Res.* 29, 725–738. <https://doi.org/10.1038/s41422-019-0195-y>

- Picelli, S., Björklund, Å.K., Faridani, O.R., Sagasser, S., Winberg, G., Sandberg, R., 2013. Smart-seq2 for sensitive full-length transcriptome profiling in single cells. *Nat. Methods* 10, 1096–1098. <https://doi.org/10.1038/nmeth.2639>
- Porta, C., Paglino, C., Mosca, A., 2014. Targeting PI3K/Akt/mTOR Signaling in Cancer. *Front Oncol* 4, 64. <https://doi.org/10.3389/fonc.2014.00064>
- Qiu, X., Hill, A., Packer, J., Lin, D., Ma, Y.-A., Trapnell, C., 2017a. Single-cell mRNA quantification and differential analysis with Census. *Nat. Methods* 14, 309–315. <https://doi.org/10.1038/nmeth.4150>
- Qiu, X., Mao, Q., Tang, Y., Wang, L., Chawla, R., Pliner, H.A., Trapnell, C., 2017b. Reversed graph embedding resolves complex single-cell trajectories. *Nat. Methods* 14, 979–982. <https://doi.org/10.1038/nmeth.4402>
- Romero-Calvo, I., Weber, C.R., Ray, M., Brown, M., Kirby, K., Nandi, R.K., Long, T.M., Sparrow, S.M., Ugolkov, A., Qiang, W., Zhang, Y., Brunetti, T., Kindler, H., Segal, J.P., Rzhetsky, A., Mazar, A.P., Buschmann, M.M., Weichselbaum, R., Roggin, K., White, K.P., 2019. Human Organoids Share Structural and Genetic Features with Primary Pancreatic Adenocarcinoma Tumors. *Mol. Cancer Res.* 17, 70–83. <https://doi.org/10.1158/1541-7786.MCR-18-0531>
- Rosenberg, A.B., Roco, C.M., Muscat, R.A., Kuchina, A., Sample, P., Yao, Z., Graybuck, L.T., Peeler, D.J., Mukherjee, S., Chen, W., Pun, S.H., Sellers, D.L., Tasic, B., Seelig, G., 2018. Single-cell profiling of the developing mouse brain and spinal cord with split-pool barcoding. *Science* 360, 176–182. <https://doi.org/10.1126/science.aam8999>
- Siegel, R.L., Miller, K.D., Jemal, A., 2018. Cancer statistics, 2018. *CA Cancer J Clin* 68, 7–30. <https://doi.org/10.3322/caac.21442>
- Tan, F., Thiele, C.J., Li, Z., 2014. Neurotrophin Signaling in Cancer, in: Kostrzewa, R.M. (Ed.), *Handbook of Neurotoxicity*. Springer, New York, NY, pp. 1825–1847. [https://doi.org/10.1007/978-1-4614-5836-4\\_49](https://doi.org/10.1007/978-1-4614-5836-4_49)
- Tiriach, H., Plenker, D., Baker, L.A., Tuveson, D.A., 2019. Organoid models for translational pancreatic cancer research. *Curr. Opin. Genet. Dev.* 54, 7–11. <https://doi.org/10.1016/j.gde.2019.02.003>
- Tuveson, D., Clevers, H., 2019a. Cancer modeling meets human organoid technology. *Science* 364, 952–955. <https://doi.org/10.1126/science.aaw6985>
- Tuveson, D., Clevers, H., 2019b. Cancer modeling meets human organoid technology. *Science* 364, 952–955. <https://doi.org/10.1126/science.aaw6985>
- Vara-Perez, M., Felipe-Abrio, B., Agostinis, P., 2019. Mitophagy in Cancer: A Tale of Adaptation. *Cells* 8. <https://doi.org/10.3390/cells8050493>
- Vasioukhin, V., 2012. Adherens junctions and cancer. *Subcell. Biochem.* 60, 379–414. [https://doi.org/10.1007/978-94-007-4186-7\\_16](https://doi.org/10.1007/978-94-007-4186-7_16)
- Yachida, S., Iacobuzio-Donahue, C.A., 2013. Evolution and dynamics of pancreatic cancer progression. *Oncogene* 32, 5253–5260. <https://doi.org/10.1038/onc.2013.29>
- Yamada, Y., Arai, T., Kojima, S., Sugawara, S., Kato, M., Okato, A., Yamazaki, K., Naya, Y., Ichikawa, T., Seki, N., 2018. Regulation of antitumor miR-144-5p targets oncogenes: Direct regulation of syndecan-3 and its clinical significance. *Cancer Sci.* 109, 2919–2936. <https://doi.org/10.1111/cas.13722>
- Yu, G., Wang, L.-G., Han, Y., He, Q.-Y., 2012. clusterProfiler: an R Package for Comparing Biological Themes Among Gene Clusters. *OMICS* 16, 284–287. <https://doi.org/10.1089/omi.2011.0118>
- Yu, X., Li, Z., Zheng, H., Chan, M.T.V., Wu, W.K.K., 2017. NEAT1: A novel cancer-related long non-coding RNA. *Cell Prolif.* 50. <https://doi.org/10.1111/cpr.12329>
- Zeng, W., Lin, Y., Lin, H., Wu, X., 2020. Silencing NEAT1 suppresses thyroid carcinoma via miR-126/NEAT1/VEGFA axis. *Front Biosci (Landmark Ed)* 25, 564–576.



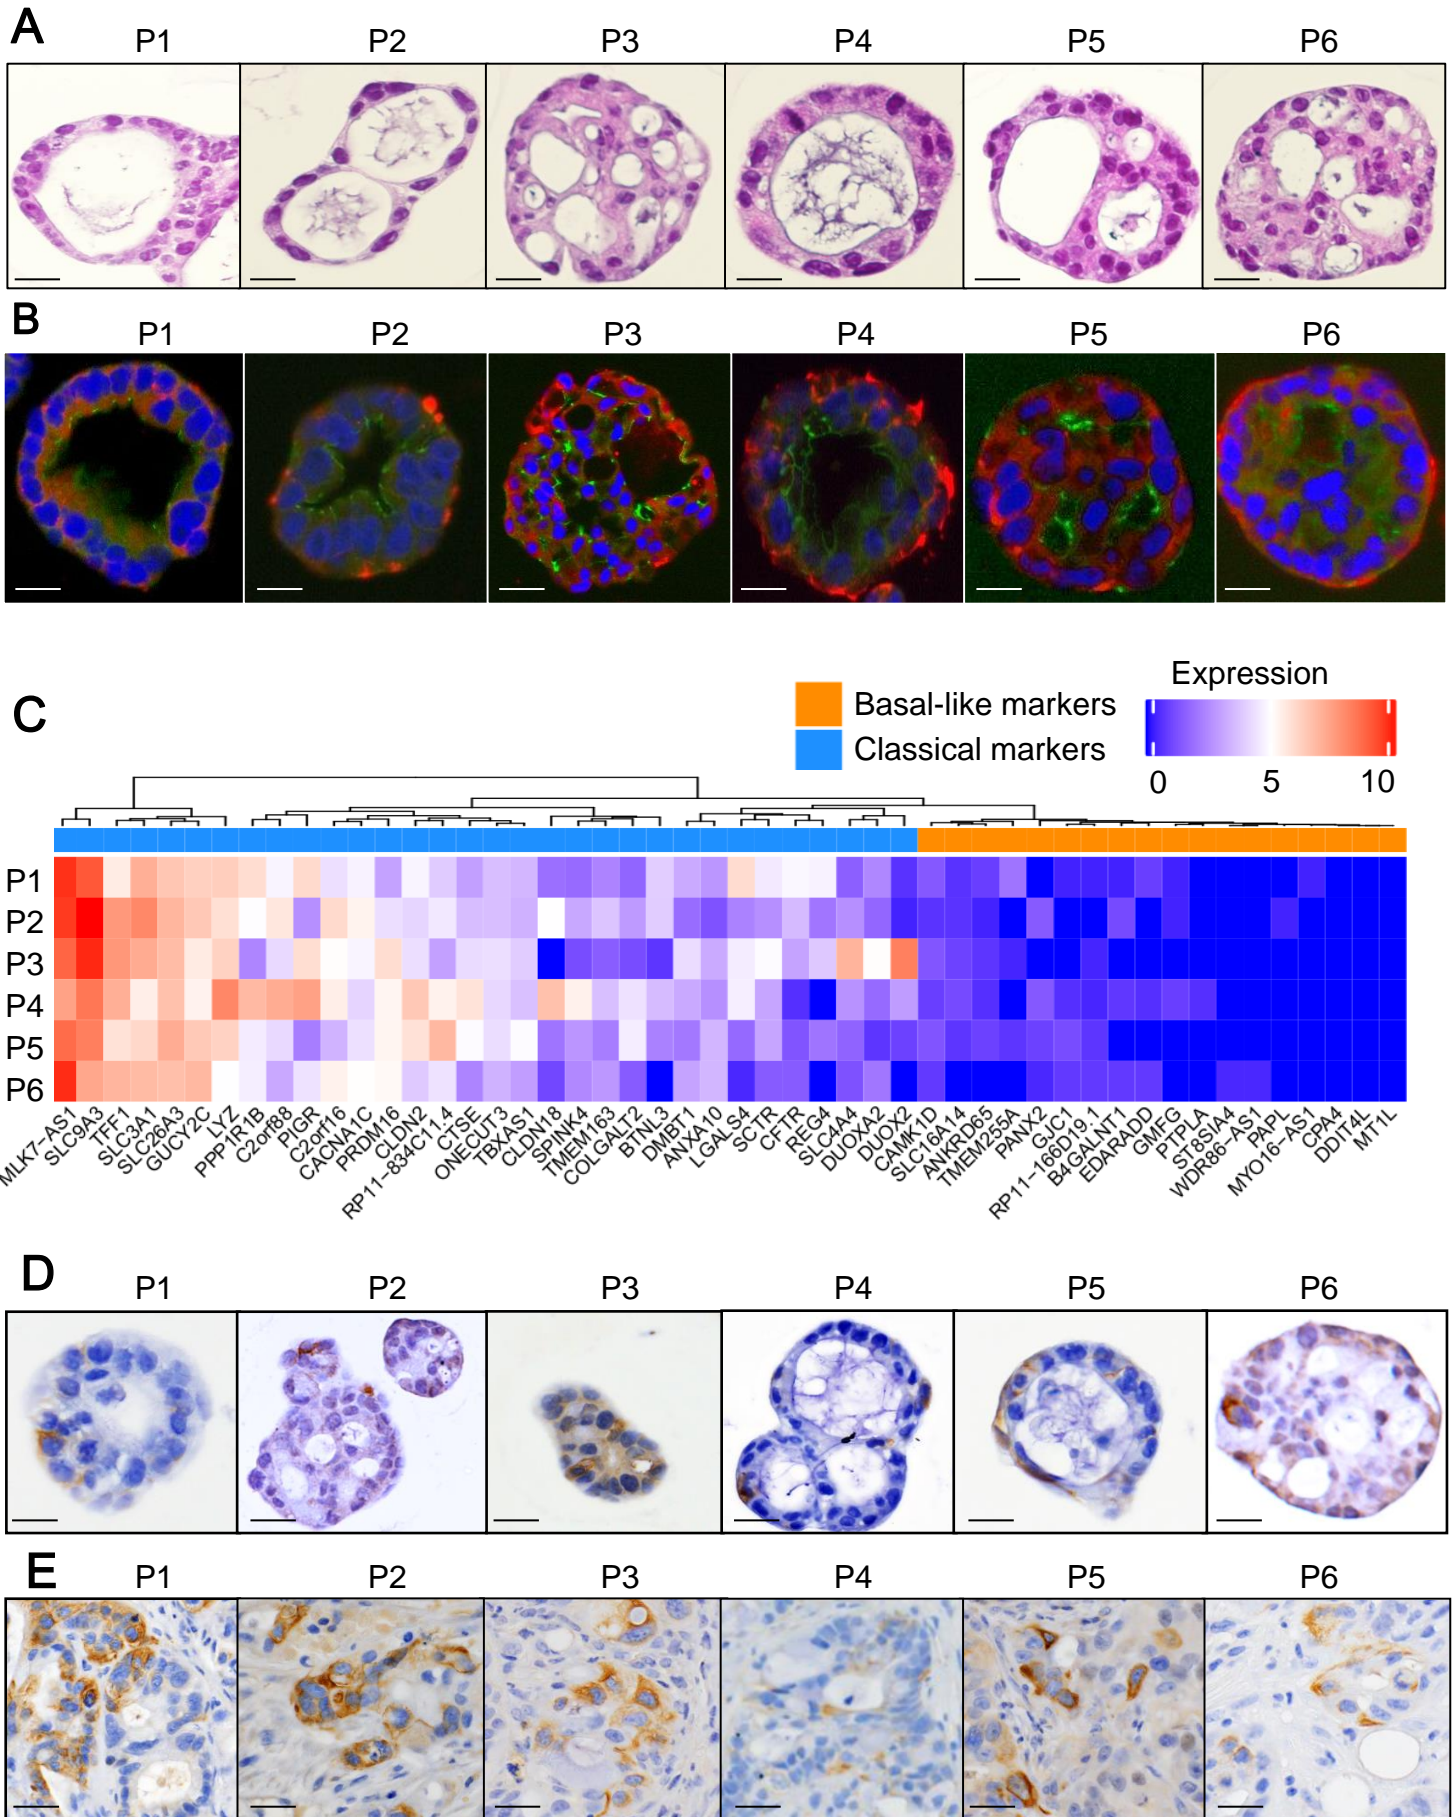

Figure 1

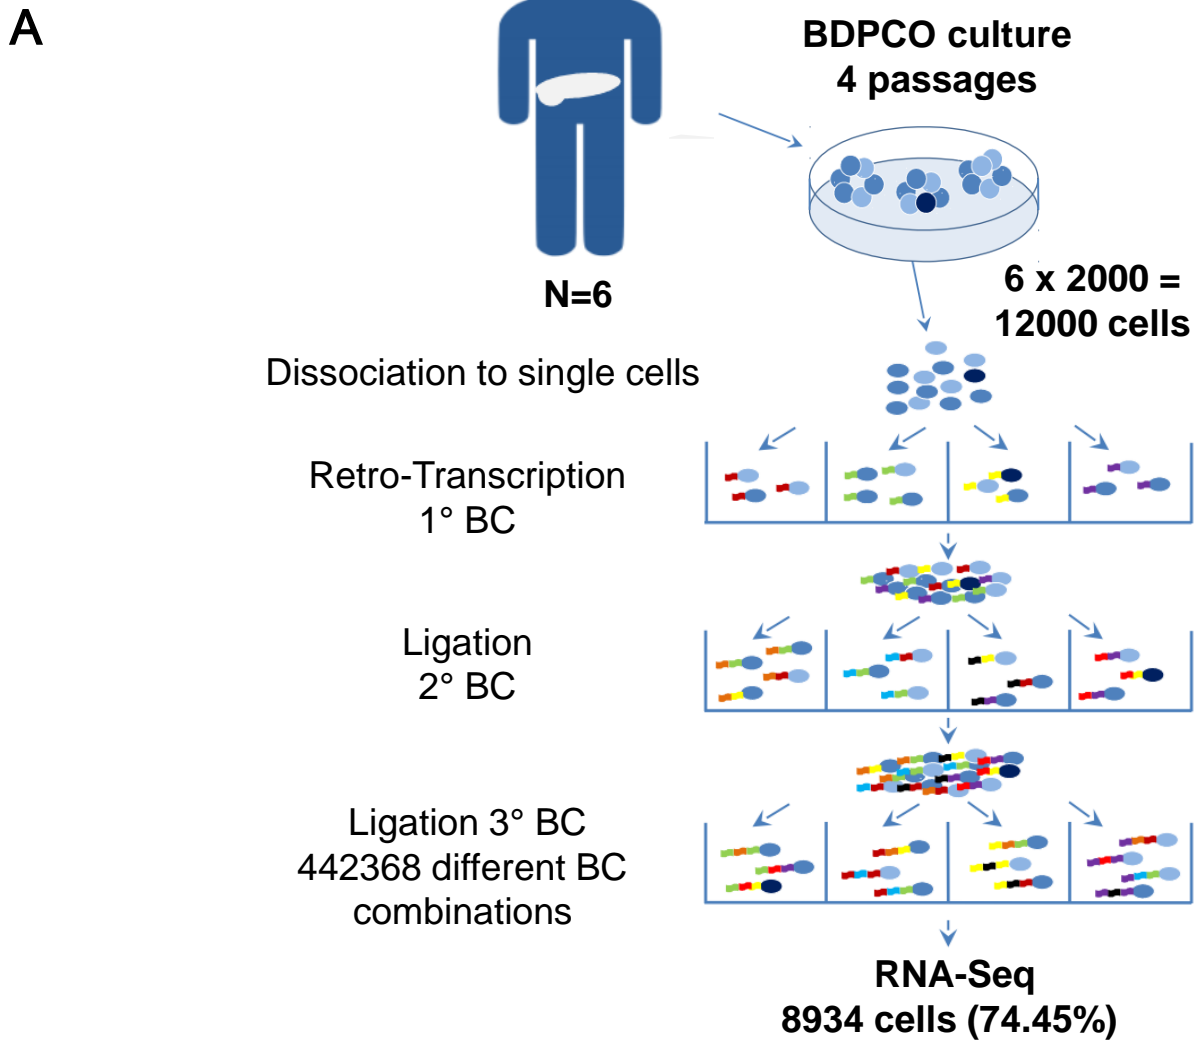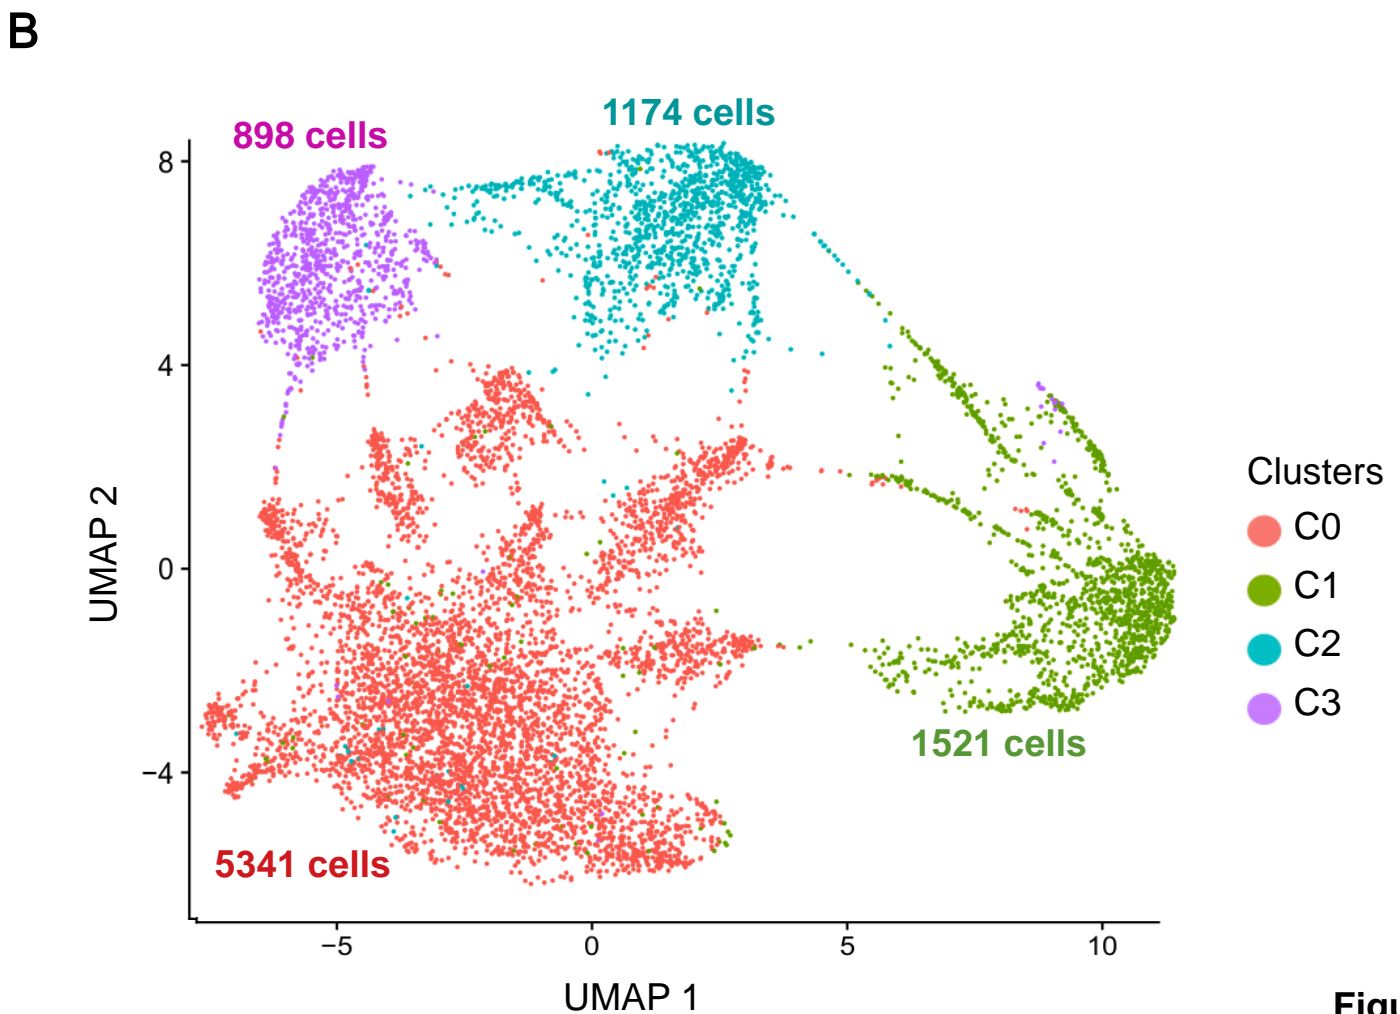

**Figure 2**



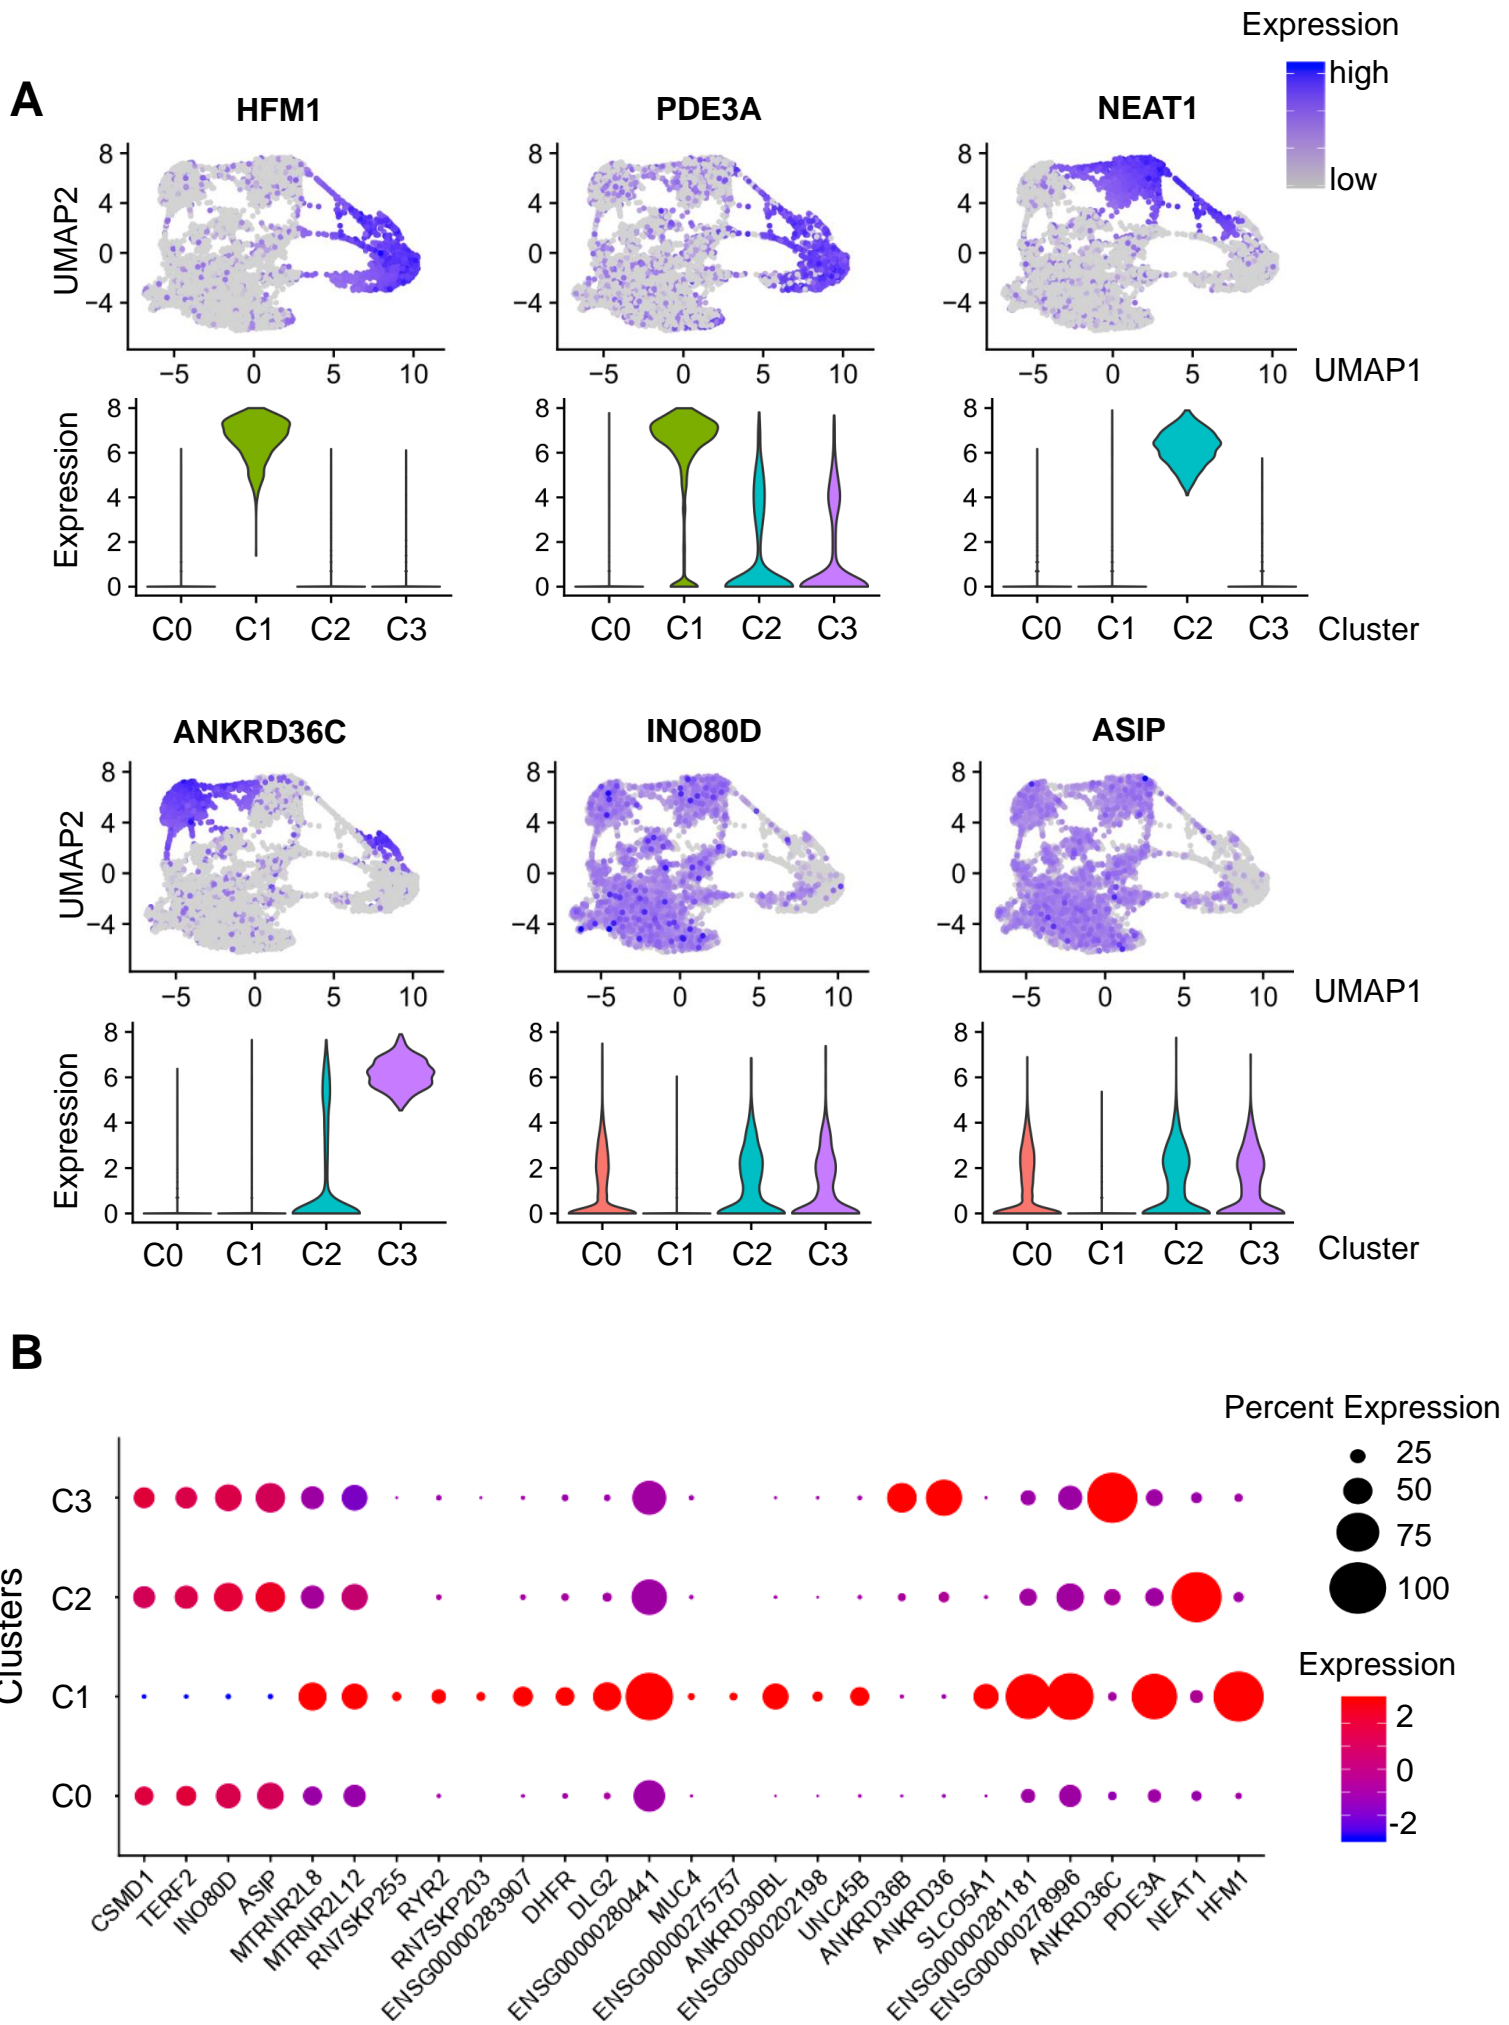

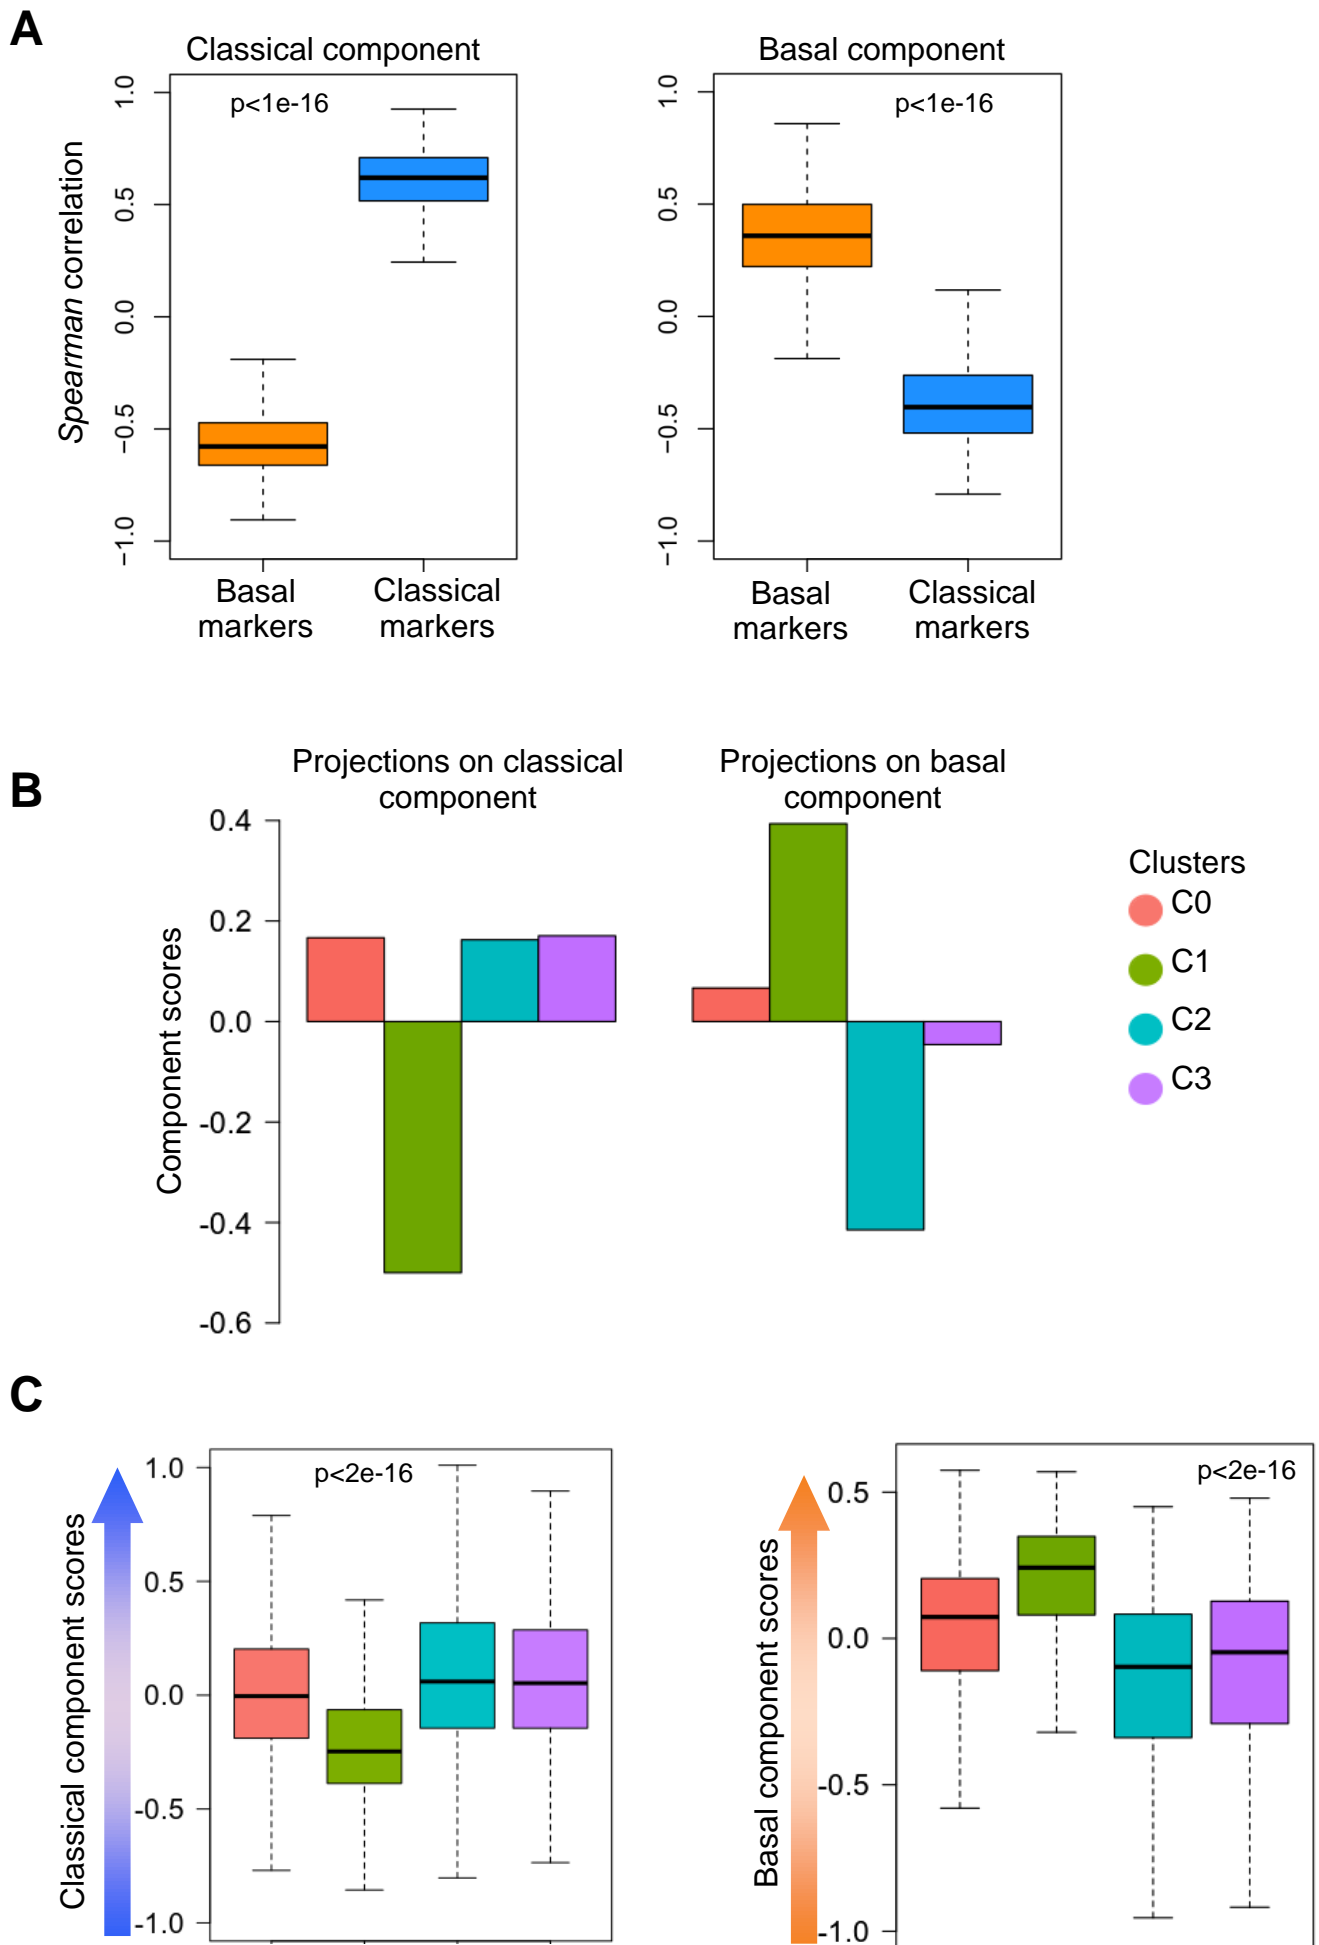

Figure 4

## KEGG pathways

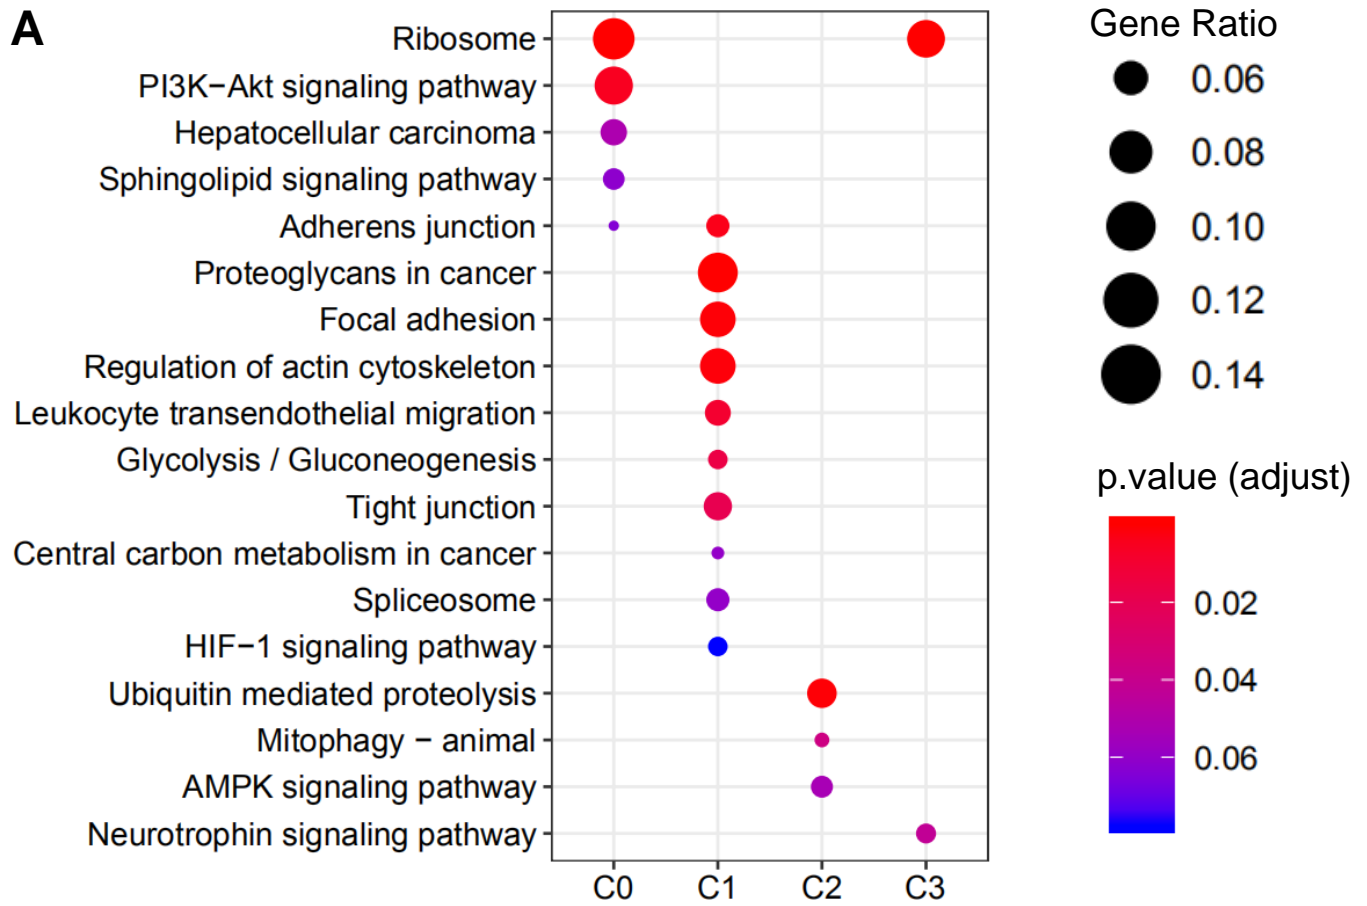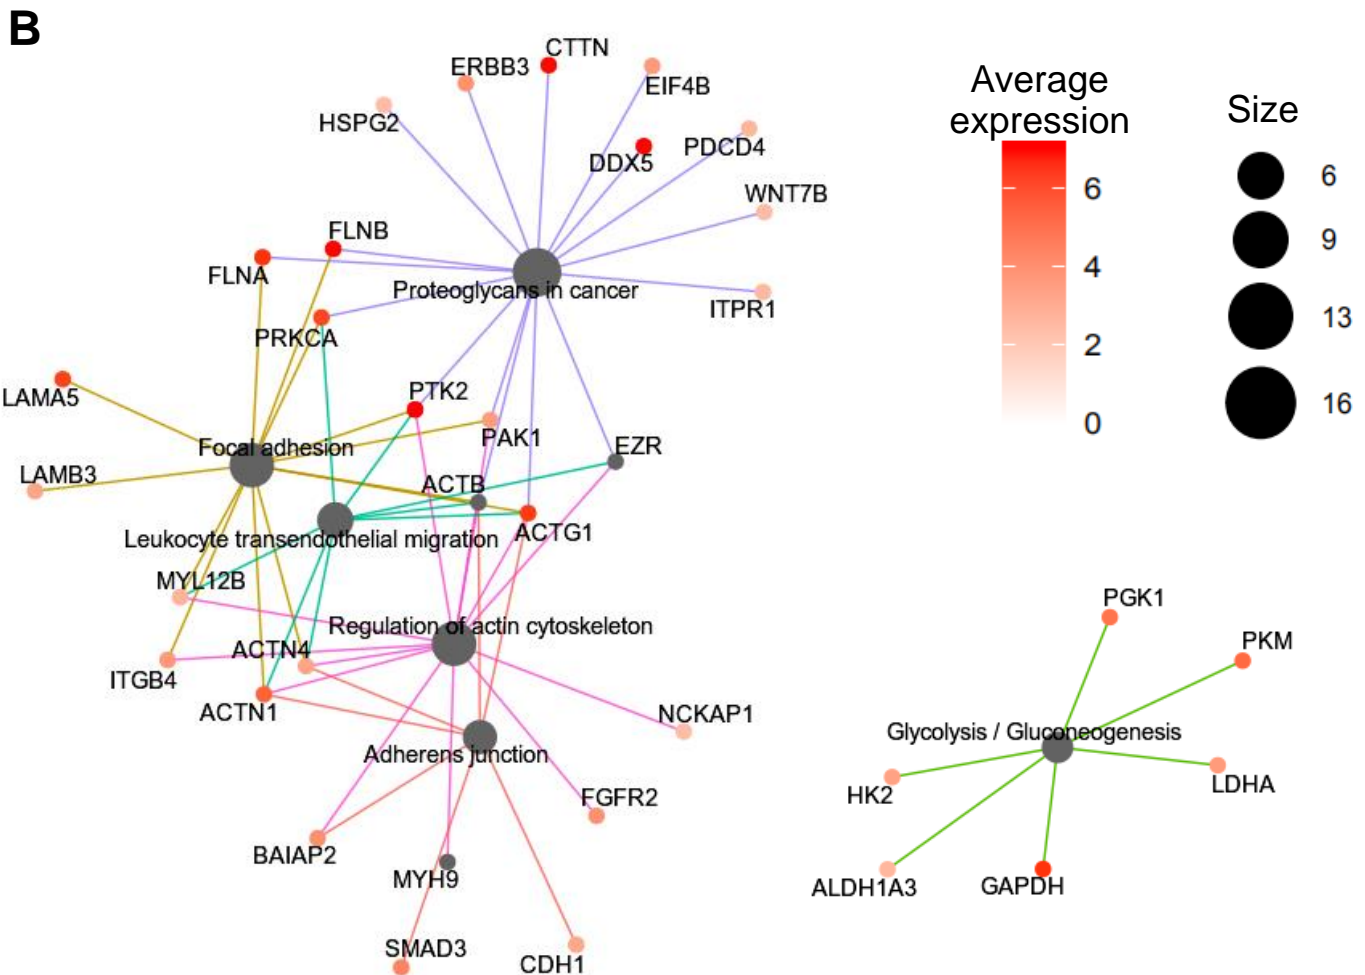

Gene-function network of top KEGG pathways in cluster C1

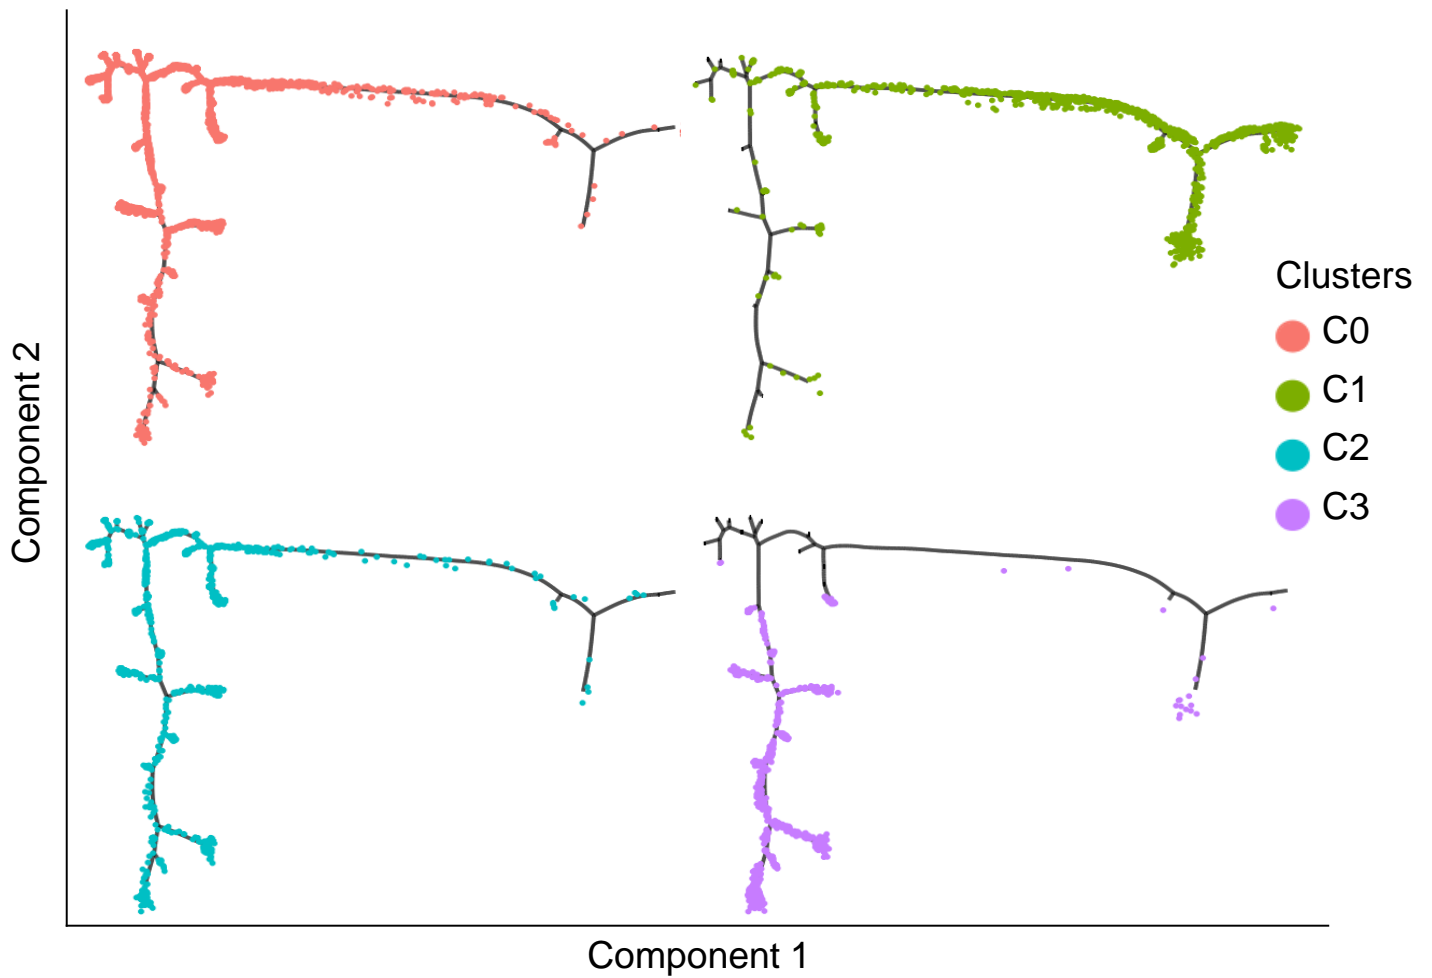

**Figure 6**

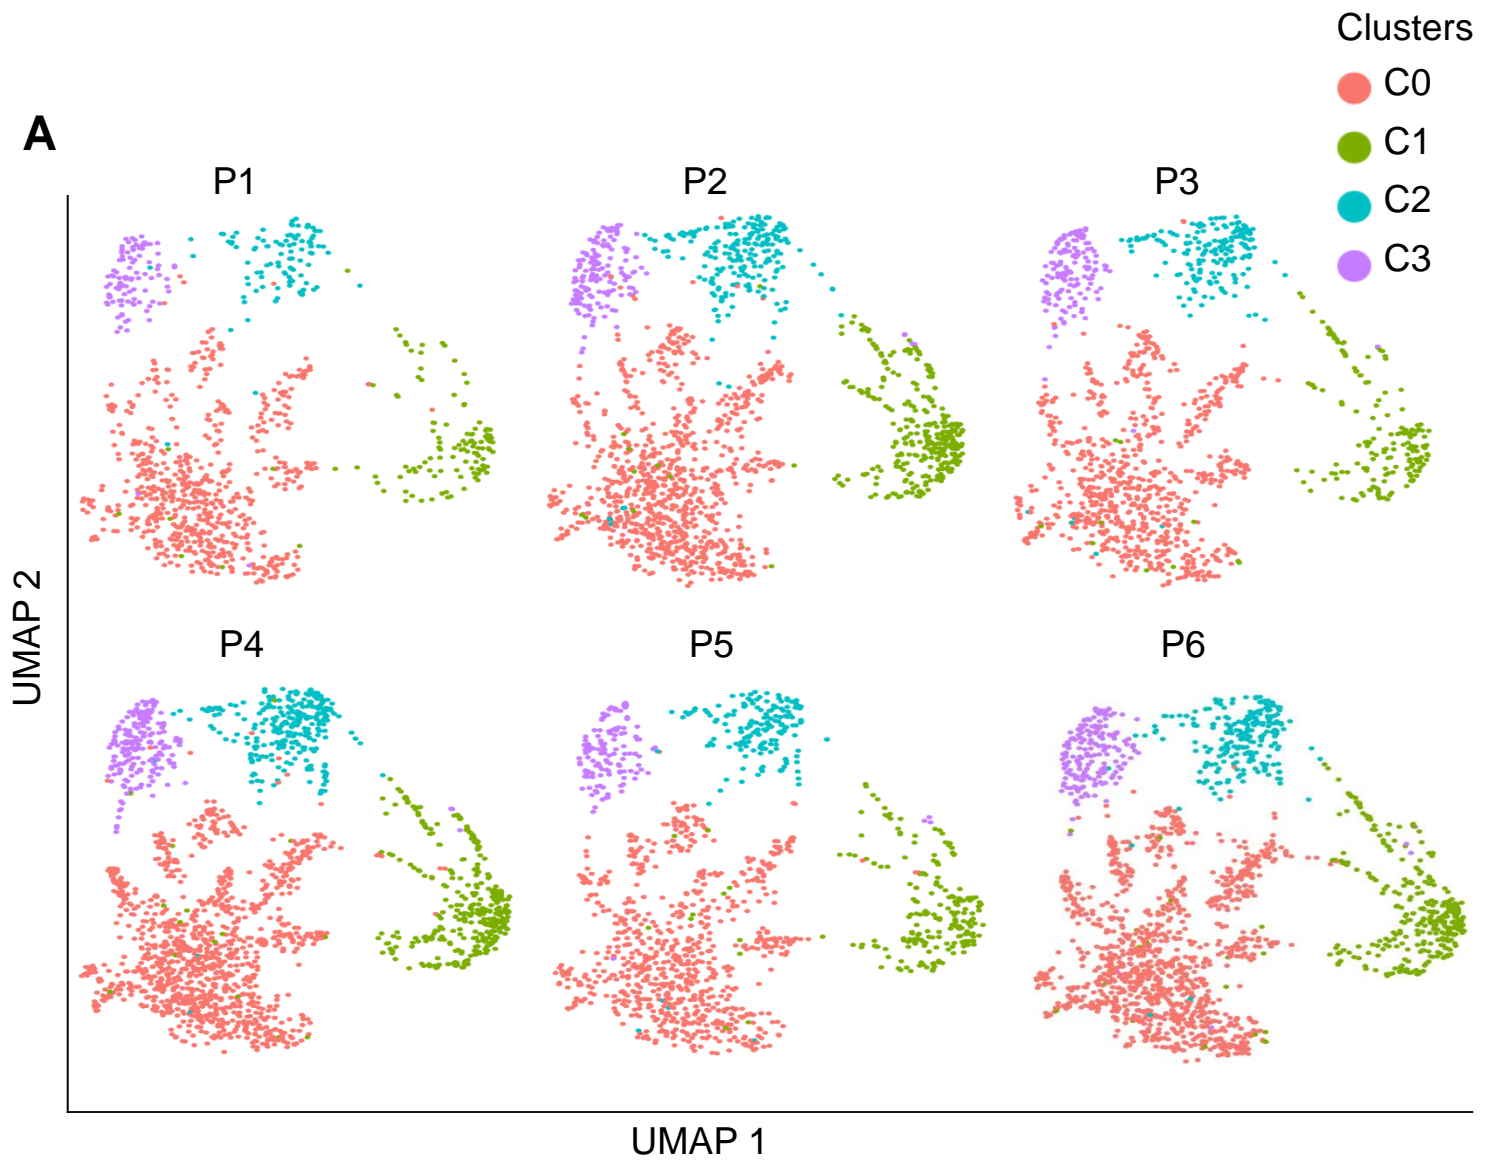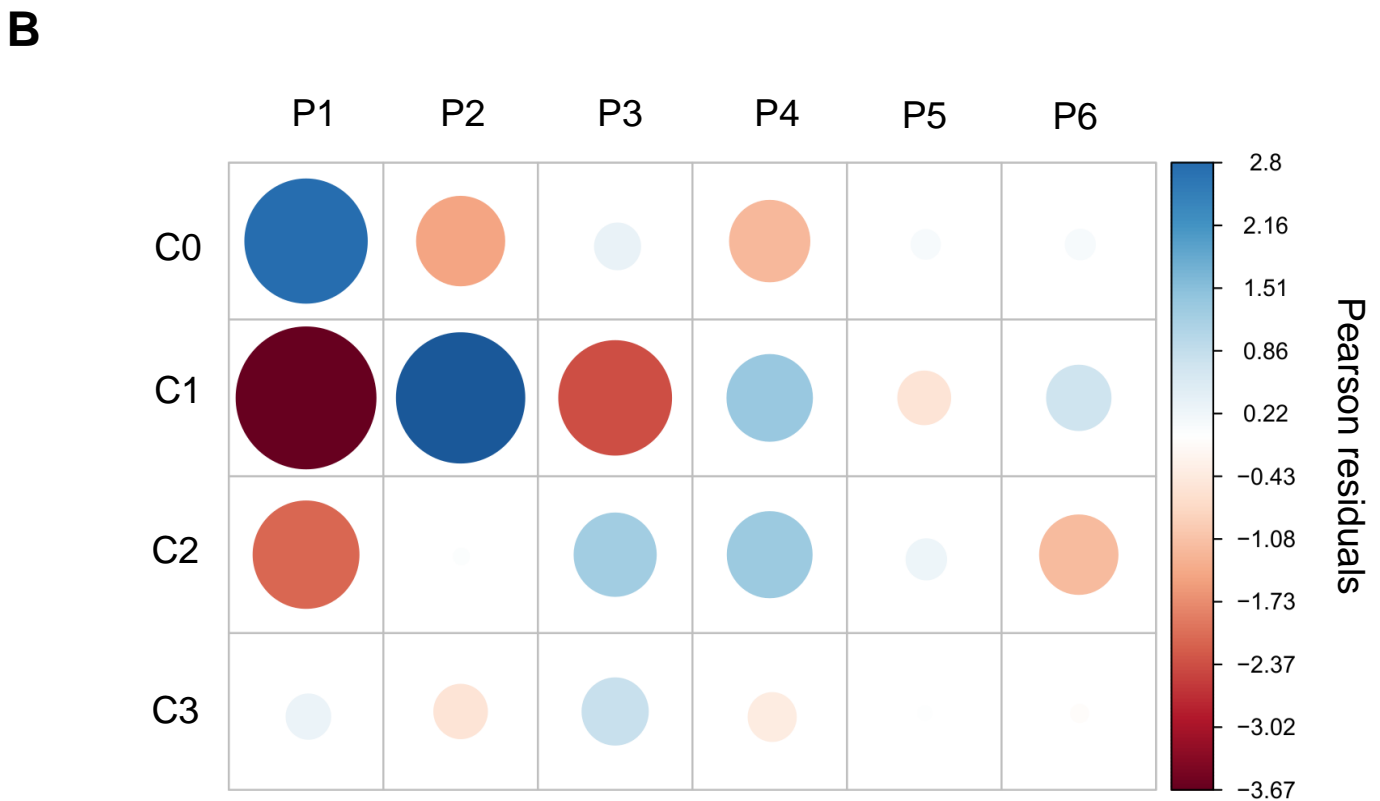

Figure 7

**A**

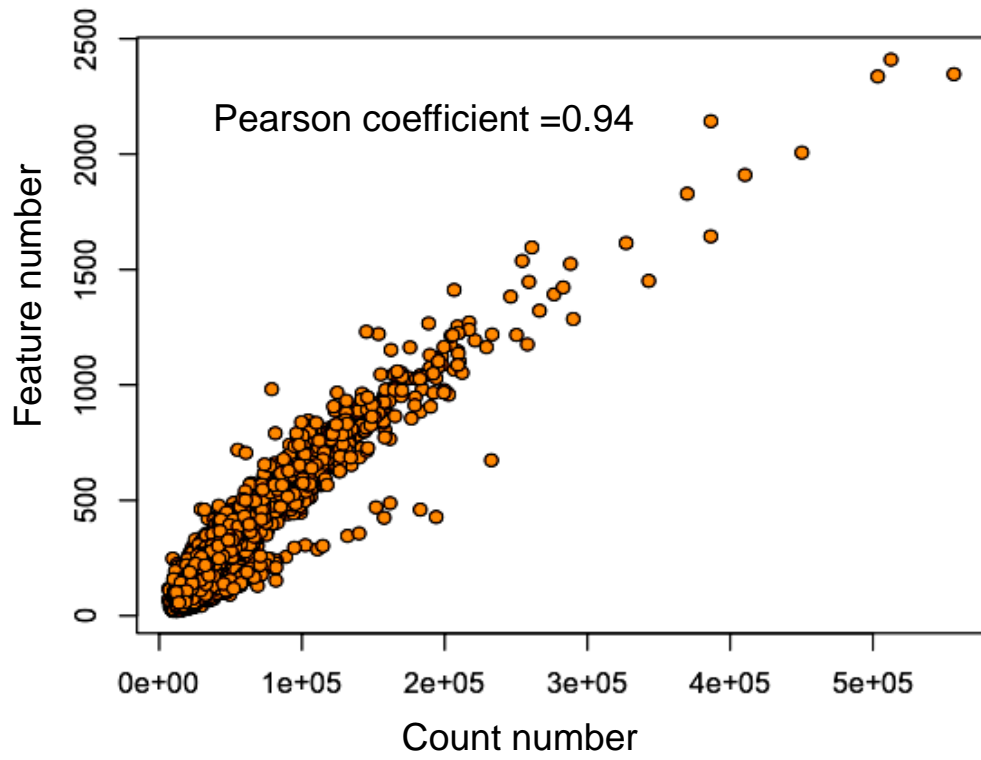

**B**

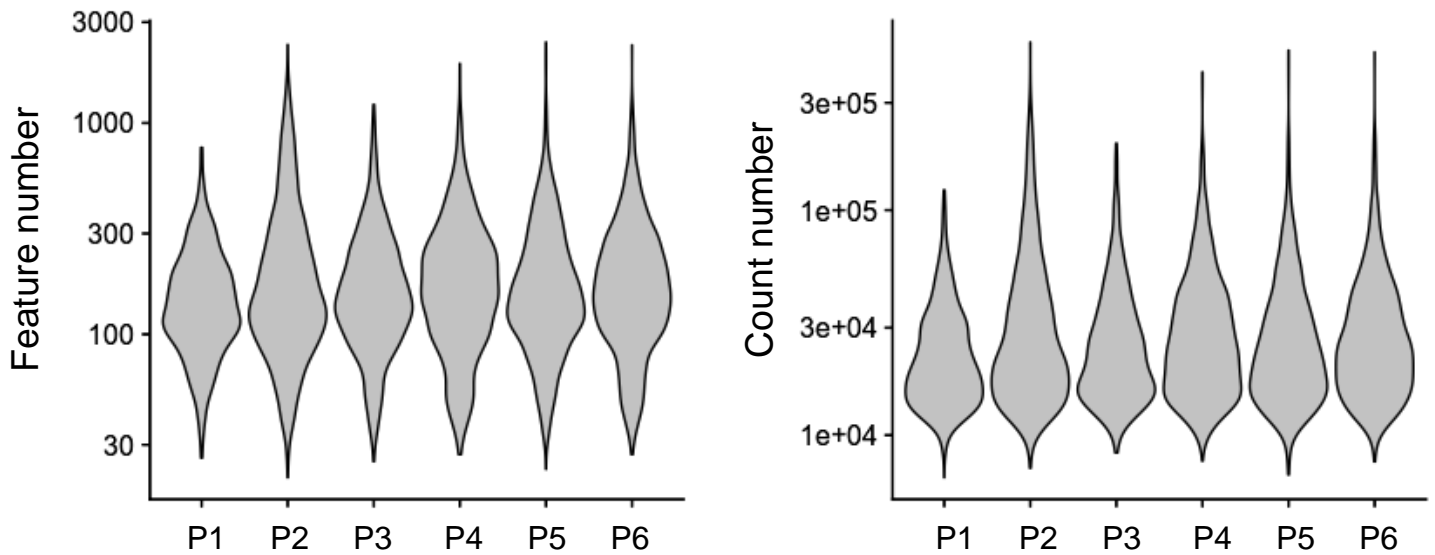

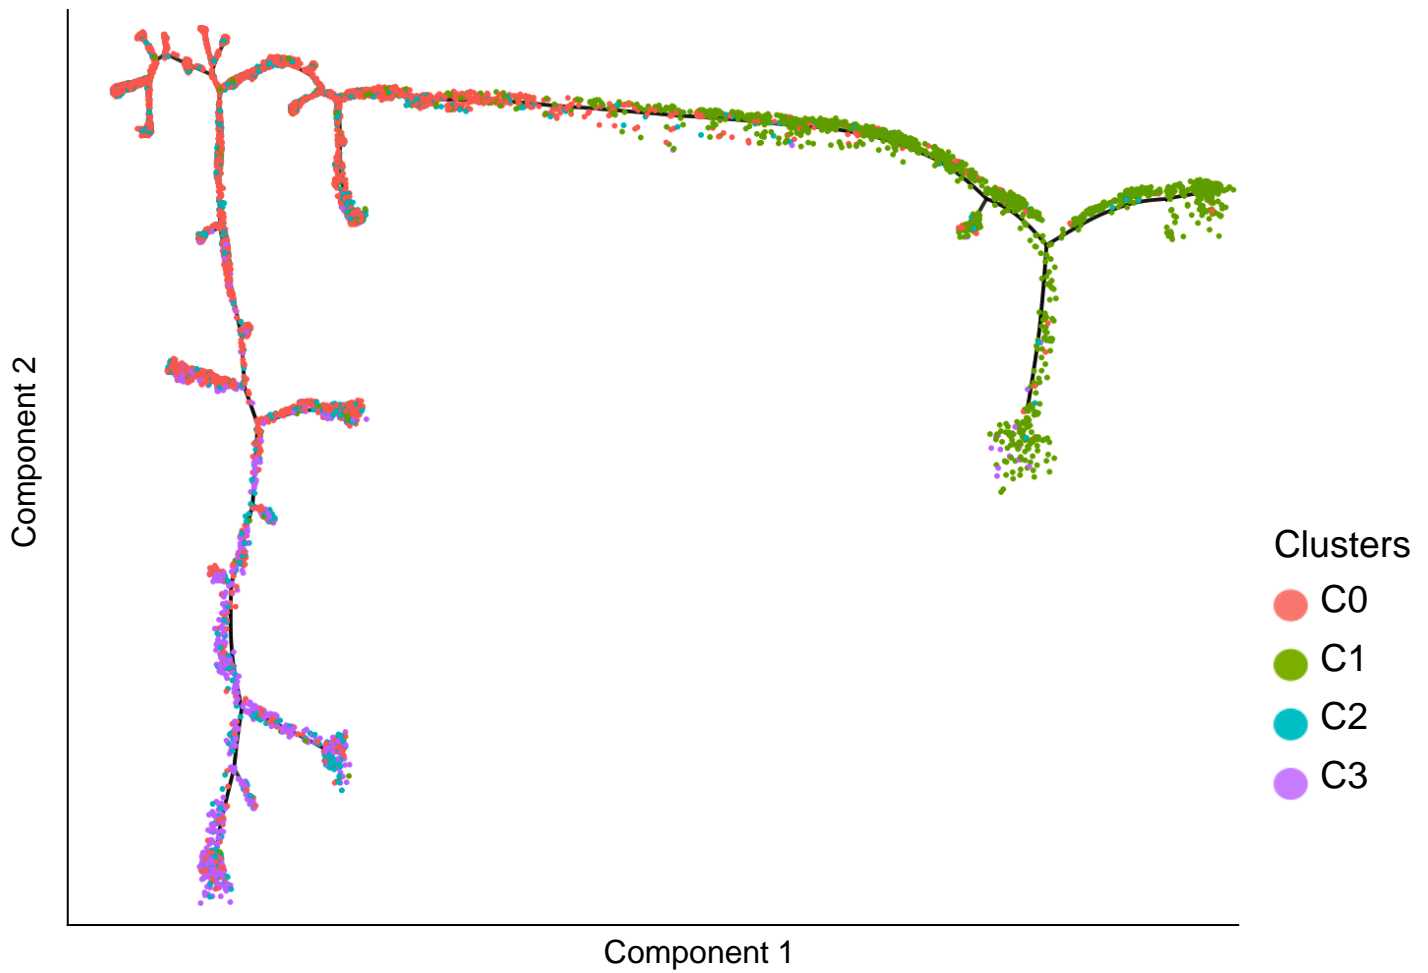

Source: https://www.biorxiv.org/content/10.1101/2020.01.07.897454v1.full.pdf
